## 1           **Single-cell transcriptomics identifies drivers of local inflammation in** 2           **multiple sclerosis**

3  
4  
5 David Schafflick<sup>1,†</sup>, Michael Cole<sup>2,†</sup>, Maike Hartlehnert<sup>1,†</sup>, Tobias Lautwein<sup>1</sup>, Konrad Buscher<sup>4</sup>, Jolien  
6 Wolbert<sup>1</sup>, Sven G. Meuth<sup>1</sup>, Mark Stettner<sup>5</sup>, Christoph Kleinschnitz<sup>5</sup>, Tanja Kuhlmann<sup>6</sup>, Catharina C.  
7 Gross<sup>1</sup>, Heinz Wiendl<sup>1</sup>, Nir Yosef<sup>3,7,8,\*‡</sup>, and Gerd Meyer zu Horste<sup>1,\*‡</sup>

8  
9 <sup>1</sup>Department of Neurology with Institute of Translational Neuroinflammation, University Hospital  
10 Münster, Münster, Germany.

11 <sup>2</sup>Department of Physics, University of California, Berkeley, CA, USA.

12 <sup>3</sup>Department of Electrical Engineering & Computer Science, Center for Computational Biology,  
13 University of California, Berkeley, CA, USA.

14 <sup>4</sup>Department of Nephrology, University Hospital Münster, Münster, Germany.

15 <sup>5</sup>Department of Neurology, University Hospital Essen, Essen, Germany.

16 <sup>6</sup>Department of Neuropathology, University Hospital Münster, Münster, Germany.

17 <sup>7</sup>Ragon Institute of MGH, MIT and Harvard, Cambridge, MA, USA.

18 <sup>8</sup>Chan Zuckerberg Biohub, San Francisco, CA 94158, USA.

19 *†These authors contributed equally*

20 *‡These authors jointly supervised the study*

21  
22  
23 *\*Correspondence to:*

24 Gerd Meyer zu Hörste, MD  
25 Department of Neurology  
26 University Hospital Münster

Nir Yosef, PhD  
Department of EECS  
University of California, Berkeley

27  
28 Albert-Schweitzer-Campus 1, Bldg A1  
29 48149 Münster  
30 Germany  
31 Tel.: +49 251 83 44428  
32 Fax.: +49 251 980 2812  
33 gerd.meyerzuehorste@ukmuenster.de

378 Stanley Hall  
Berkeley 94720  
USA  
Tel.: +1 510 642 9640  
Fax.: +1 510 643 7846  
niryosef@berkeley.edu

34  
35  
36 Running title: CSF cell transcriptomics in MS

37  
38 Keywords: transcriptomics, single-cell RNA-seq, cerebrospinal fluid, multiple sclerosis, T follicular  
39 helper cells, experimental autoimmune encephalomyelitis.  
40  
41  
42

43 **One Sentence Summary**

44 Unbiased single-cell transcriptomics re-defines the transcriptional landscape of cerebrospinal fluid  
45 leukocytes and identifies T follicular helper cells as essential drivers of local inflammation in multiple  
46 sclerosis.

47

48 **Abstract**

49

50 Single-cell transcriptomics enables unbiased biological discovery and holds new promise for  
51 personalized medicine. However, its potential for understanding human diseases by comparing patient  
52 vs. control samples in a clinical setting remains largely unexplored. Here, we applied single-cell RNA-  
53 sequencing (scRNA-seq) to rare cerebrospinal fluid (CSF) specimens from well-characterized controls  
54 and patients with multiple sclerosis (MS) – a prototypic inflammatory disease of the central nervous  
55 system (CNS). We thereby generated and validated the first transcriptional atlas of single CSF  
56 leukocytes in health and disease. In MS patients, we found an expansion of natural killer cells and late  
57 B cell lineages and based on these insights we developed a score with potential diagnostic relevance.  
58 Using this analytical approach, we identified and characterized activated phenotypes of MS-derived  
59 CSF leukocytes, including an enrichment in T follicular helper (TFH) cell transcriptional signatures.  
60 We validated the expansion of such B cell-helping TFH cells in MS patients and demonstrated that TFH  
61 cells exacerbate symptoms in an animal model of MS and promote B cell infiltration of the CNS. TFH-  
62 dependent B cell expansion may thus drive local CNS autoimmunity in MS. Our study demonstrates  
63 how single-cell transcriptomics can identify novel disease mechanisms in a clinically-relevant case-  
64 control study design.

65

## 66 **Introduction**

67

68 Single-cell transcriptomics is a transformative and rapidly evolving technology generating biological  
69 information at unprecedented resolution and scale. The technique has mostly been employed to re-  
70 define the heterogeneity of complex tissues derived from healthy rodents or humans (1, 2). The novelty  
71 of these studies has mostly been limited to the identification of previously unrecognized cell types or  
72 cell phenotypes (3) and the regulation of their development. Diseased tissues have also been analyzed  
73 with single-cell technologies and the cancer field has seen especially rapid adaptation of these methods  
74 (4, 5). Proponents of the technology posit that insights from single-cell transcriptomics are likely to  
75 translate into palpable benefits for human patients and enable precision medicine in the not-too-distant  
76 future (6–8). However, outside of the field of cancer (9), we are currently aware of only a handful of  
77 studies that utilize this technology to compare tissue samples from disease-affected donors against those  
78 of separate control donors in a clinically relevant setting (10, 11). This leaves many methodological  
79 questions unexplored. Case-control studies are particularly important in systemic immune disease,  
80 when healthy control tissue cannot be reliably obtained. Indeed, many analytical tools for identifying  
81 differences between two sets of single-cell profiles (e.g. malignant vs. non-malignant) have been  
82 developed (12), but their applicability to a clinically relevant case-control scenario has not yet been  
83 examined.

84 Here, we applied single-cell transcriptomics to cerebrospinal fluid (CSF) cells from patients with  
85 multiple sclerosis (MS) and controls, validating key findings with flow cytometry and mouse model  
86 studies. MS is a chronic inflammatory, demyelinating disorder of the central nervous system (CNS) –  
87 most likely of autoimmune origin – causing substantial disability (13). We chose this paradigmatic  
88 inflammatory disease, because many questions remain unanswered despite a vast amount of available  
89 literature. Evidence supports the involvement of both T cells and B cells in MS, but the relative  
90 contribution of each cell type to disease aetiology is unknown. On the one hand, both the expansion of  
91 B cells and the production of immunoglobulins occur in the CNS (14) and B cell depleting therapies  
92 are effective in MS (15). On the other hand, T cells are abundant in MS lesions (16, 17) and T cells are  
93 affected by many established MS treatments and induce an MS-like condition named *experimental*

94 *autoimmune encephalomyelitis* (EAE) in rodents (18). Much needs to be learned about the interaction  
95 of T with B cells in MS.  
96 CSF is a rare and clinically important specimen that has been studied extensively in MS, but has not yet  
97 been adequately analyzed with unbiased transcriptome methods (19). We speculated that a study of this  
98 fluid can serve as the basis for an important proof of principle: translating single-cell transcriptomic to  
99 the bedside. CSF is a clear liquid that envelops the CNS and provides mechanical protection and trophic  
100 support (20) and acts as transport medium for immune cells (21). Under healthy conditions, the *non-*  
101 *cellular* fraction of CSF is mostly an ultra-filtrate of serum (22). In contrast, CSF *cells* - derived  
102 exclusively from the hematopoietic lineage - exhibit a distinct and tightly controlled cellular  
103 composition. Compared to blood, leukocyte concentrations in the CSF are 1,000-fold lower and CD4<sup>+</sup>  
104 T lymphocytes predominate, while myeloid-lineage cells are rare (23). Clinically, CSF provides a  
105 unique diagnostic window into immune-related processes in the CNS. In MS, CSF exhibits several  
106 disease-associated changes including an increased concentration of oligoclonal immunoglobulins (24,  
107 25). Flow cytometry-based studies have also identified an expansion of B lineage cells in MS (23, 26)  
108 with evidence of antigen-driven maturation (27, 28). However, the mechanisms promoting maturation  
109 of B cells such as class-switching in the CSF have not been identified and an unbiased characterization  
110 of CSF cells is missing.  
111 Here we have used single-cell transcriptomics to generate a comprehensive map of the cellular  
112 composition and transcriptional phenotype of CSF cells in MS, demonstrating the feasibility of this  
113 technique in its application to human CSF samples. We find high levels of transcriptional and cellular  
114 heterogeneity across donors, an important consideration for future power calculations. We demonstrate  
115 why analyses aimed at capturing relevant disease-associated changes across a transcriptional continuum  
116 require novel analytical tools, and we introduced a new approach termed cell set enrichment analysis  
117 (CSEA) to address some of these challenges. Through these analyses, we make disease-related  
118 discoveries, like class-switched B lineage cells expanded in the CSF in MS. These changes coincide  
119 with an expansion of B cell-helping T follicular helper (TFH) cells that promote CNS auto-immunity  
120 and local B cell infiltration in animal models of the disease. These insights, derived from single-cell



121 transcriptome technology, lead us to propose a new cellular mechanism, locally driving CNS  
122 autoimmunity and disability in MS.

123

## 124 **Results**

### 125 *Single-cell transcriptomics identifies the composition of cerebrospinal fluid cells*

126

127 We aimed to characterize clinically relevant CSF cells in greater detail and to evaluate the applicability  
128 of single-cell transcriptomics in a translational setting. We optimized processing of primary human CSF  
129 cells (Methods) decaying rapidly in nutrient-poor CSF (29) and analysed these cells using 1)  
130 microfluidics-based single-cell RNA-sequencing (scRNA-seq) (30) and 2) flow cytometry (Fig. 1A).

131 We first performed scRNA-seq on total unsorted CSF cells from treatment-naïve patients (n = 6) with  
132 either a first episode indicative of MS (i.e. clinically isolated syndrome (CIS)) or a first diagnosis of  
133 relapsing-remitting MS. For simplicity, we refer to this cohort as MS (Methods). Patients with  
134 idiopathic intracranial hypertension (IIH) served as controls (n = 6), because CSF itself is normal in IIH  
135 (31) while the production and absorption of CSF are unbalanced (32). Both cohorts were well matched  
136 with regard to age and sex (Fig. S1A and Table S1). Standard CSF and disease parameters were either  
137 comparable between groups or exhibited known MS-associated changes (Fig. S1B and Table S2).

138 After quality control and removal of low quality cells and samples (2 donors per group; see Methods),  
139 our scRNA-seq approach returned transcriptional information for a total of 22,357 high-quality CSF  
140 cells from 4 control and 4 MS donors, with an average of  $833 \pm 193$  SD genes detected per cell (Table  
141 S3). After normalization (Methods) and unbiased cell type clustering, we identified a total of 10 CSF  
142 cell clusters (Fig. 1B and Fig. S2A). Initially, CD4<sup>+</sup> T cells did not cluster reliably into known lineages  
143 and were therefore tentatively merged into one cluster (CD4\_Tc). We manually assigned cluster  
144 identities based on known marker gene expression (Fig. 1C-D and Table S4; see Methods) and gene set  
145 enrichment analysis (GSEA) of marker genes (Table. S5). CSF cells featured a strong predominance of  
146 T cells (more CD4<sup>+</sup> than CD8<sup>+</sup>) over monocyte lineage cells, natural killer (NK) cells, dendritic cells  
147 (DC), and B lineage cells including B cells (Bc) and plasma cells (plasma) (Fig. 1B and Fig. S2A-B).  
148 Granulocytes, megakaryocytes, and non-hematopoietic cells (e.g. neurons, glia, ependymal cells) were

149 not represented in our clustering of CSF cells (Fig. 1B) as these cell types are not present in the CSF  
150 (23). Simultaneous flow cytometry of samples from all cohorts confirmed this unique composition of  
151 CSF leukocytes (Fig. S3A-C) in accordance with previous studies (23). Thus, single-cell  
152 transcriptomics reliably reconstructs the composition of primary human CSF cells.

153

154 *Single-cell transcriptomics identifies an MS-specific composition of CSF leukocytes*

155

156 Next, we analysed our dataset for disease-specific differences in CSF cell composition (Fig. 2A).  
157 Overall, inter-donor variability was high (Fig. S2B). Despite this variability, there were significant  
158 compositional differences between the MS and control cohorts (Methods). Binomial regression  
159 modelling of scRNA-seq cluster membership counts reflects a significant decrease in the proportion of  
160 non-classical monocytes relative to classical monocytes in MS (Wald test  $P < 10^{-8}$ ; Fig. 2B). A  
161 decreased ratio of non-classical / classical monocytes was confirmed by flow cytometry (t-test  $P < 0.01$ ;  
162 Fig. S3B). The absolute abundance of non-classical monocytes is known to decrease in MS (33); in our  
163 small scRNA-seq study, high variability in absolute non-classical monocyte abundance across the 8  
164 donors suffices to explain apparent sampling differences between disease conditions ( $P > 0.01$ ,  
165 empirical Bayes moderated t-test). Despite high inter-donor variability, we found statistically  
166 significant expansions of NK cells, B cells, and class-switched late lineage B cells (i.e. plasma cells) in  
167 MS ( $P < 0.01$  empirical Bayes moderated t-test; Fig. 2A-C) that was confirmed by flow cytometry (t-  
168 test  $P < 0.01$ ; Fig. S3B) and was in accordance with previous studies (33, 34). Of note, plasma cells  
169 were detected in samples of all 4 MS patients but were virtually absent from control-derived CSF  
170 samples (Fig. 2A and Fig. S2B).

171 The expansion of B lineage cells was a uniquely MS-specific feature (Fig. S4C) and we therefore  
172 examined these clusters in greater detail. In the B cell cluster, IGHD (marker of naïve B cells) and  
173 IGHM genes were dominantly expressed in 5% and 34% of B cells, respectively (Fig. S4A,D). The  
174 expression of heavy chain genes was dominated by IGHG genes in the plasma cell cluster (83%; Fig.  
175 S4B,D) while fewer cells expressed IGHA genes (encoding IgA chains). This verifies that the vast  
176 majority of plasma cells in the CSF are class-switched. In both B cells and plasma cells the ratio between

177 dominant  $\kappa$ -light chain (encoded by IGKC) expression and dominant  $\lambda$ -light chain (encoded by IGLC  
178 genes) expression was approximately 2:1 – a physiological surface expression ratio for blood B cells  
179 (Fig. S4D). In accordance with previous studies (14, 27, 28, 35), our findings suggest that local B cell  
180 maturation, including both class-switching and proliferation, occur within the CSF compartment in MS.  
181 Our comprehensive profiling of CSF cells in MS had identified changes in the relative abundances of  
182 B lineage cells, NK cells, and in monocyte subsets. We speculated that a combination of these  
183 parameters – rather than one single parameter – could aid diagnosing MS if quantifiable with flow  
184 cytometry. We therefore used the combined flow cytometry data as a baseline for calculating a  
185 composite score that was higher in MS-derived than control CSF samples (Fig. S5). This score  
186 discriminated MS from control with good sensitivity and specificity in this preliminary cohort. This  
187 indicates that single-cell transcriptomics of CSF cells can propose novel diagnostic schemes.

188

#### 189 *Characterizing the distribution of CD4<sup>+</sup> T cell states*

190

191 We next aimed to dissect the composition of the tentatively merged CD4<sup>+</sup> T cells in our data. We  
192 extracted all cells assigned to the CD4<sup>+</sup> T cell (CD4\_Tc) cluster, performed secondary normalization  
193 and clustering, and thereby identified eight sub-clusters (Fig. 2D,E). Two of these were identified as  
194 remaining CD8<sup>+</sup> T cells (r-CD8) and remaining monocytes (r-mono) based on transcriptional markers  
195 and were removed from further analysis. A transcriptionally distinct (Fig. 2F and Table S4) cluster of  
196 FOXP3 expressing (i.e. most likely regulatory) T cells (Treg) was more abundant in two and especially  
197 abundant in one, albeit not all MS donors (Fig. S2C). Clinical and MRI disease features were not  
198 different in these two MS patients (data not shown) supporting sub-clinical MS heterogeneity. Based  
199 on mean expression and statistically significant one vs. all differential expression of known marker  
200 genes (Fig. 2F and Table S4) and cluster specific GSEA (Table S5), two of the remaining clusters were  
201 transcriptionally best described as naïve (up-regulation of SELL (CD62L), CCR7 (CD197), and CD27,  
202 FDR < 0.05; n\_CD4: SELL<sup>hi</sup>CCR7<sup>hi</sup>CD44<sup>lo</sup>CD69<sup>lo</sup> and CD27<sup>hi</sup>) and as proliferating or differentiating  
203 CD4<sup>+</sup> T cells (up-regulation of SELL, CCR7, FDR < 0.05; prol\_CD4: SELL<sup>hi</sup>CCR7<sup>hi</sup>CD44<sup>lo</sup>CD69<sup>lo</sup> and  
204 CD27<sup>lo</sup>). The latter cluster expressed ribosomal genes (e.g. RPS8, RPS6) and nucleus forming

205 transcripts. Abundance of such proliferating T helper cells was increased in MS-derived samples (Fig.  
206 2G) potentially indicating local expansion of CD4<sup>+</sup> T cells in the CSF in MS. Three of the remaining  
207 clusters exhibited a memory-like phenotype (SELL<sup>int/lo</sup>CCR7<sup>int/lo</sup>) and were transcriptionally best  
208 described as central memory (up-regulation of CD69, FDR < 0.05; cm\_CD4: CD69<sup>hi</sup>CD44<sup>hi</sup> and  
209 CD27<sup>hi</sup>), as early effector memory (up-regulation of IL7R and CD69, FDR < 0.05; eem\_CD4:  
210 CD69<sup>hi</sup>CD44<sup>hi</sup> and CD28<sup>hi</sup>), and as late effector memory (up-regulation of IL7R, FDR < 0.05;  
211 lem\_CD4: CD69<sup>int</sup>CD44<sup>hi</sup> and CD28<sup>lo</sup>) CD4<sup>+</sup> T cells. These clusters showed no significant disease-  
212 specific expansion or contraction, after accounting for donor variability. Flow cytometry detected no  
213 significant differences in the proportion of total CD4<sup>+</sup> vs. CD8<sup>+</sup> T cells in MS (Fig. 2H) indicating that  
214 changes to T cells in MS are subtle, occurring at the subset level.

215 While the division of the CD4<sup>+</sup> T cells into sub-clusters was informative in this context, we found that  
216 the resulting clusters are not very well distinguished from one another (Table S4) and that CD4<sup>+</sup> T cells  
217 *transcriptionally* instead form a continuum of cell states, in accordance with previous scRNA-seq  
218 studies (30, 36). Indeed, independent of our clustering analysis, we explored how transcriptional  
219 signatures vary across the entire CD4<sup>+</sup> T cell population, using VISION (an updated R version of  
220 FastProject (37) <https://github.com/YosefLab/VISION>). This analysis highlighted a continuum of  
221 transcriptional CD4<sup>+</sup> T cell states that span multiple sub-clusters in terms of T cell activation and  
222 memory (Fig. S6A,B), thereby providing a view of the data complementary to our analysis above.  
223 Analysis of MS-related transcriptional changes of CD4<sup>+</sup> T cells may therefore benefit from techniques  
224 that do not depend on data-driven partitions, e.g., clusters. These insights motivated our development  
225 of CSEA below (see also Fig. S7,8).

226

227 *Single-cell transcriptomics can help interpreting MS genetics, transcriptomics and diagnosis*

228

229 We aimed to systematically compare our transcriptome characterization of CSF cells against available  
230 data-sets. A single study had previously reported expression profiling of CSF cells in relapsing-  
231 remitting MS, albeit not at single-cell level (19). This approach identified signs of local B cell  
232 expansion, but offered limited additional insight because *unsorted* cells were profiled. We therefore

233 used our scRNA-seq data to systematically infer the cellular composition of these *unsorted* CSF cells  
234 in MS patients in relapse and remission (n = 26 per group) using a deconvolution algorithm (38).  
235 Deconvolution was unable to reliably discern NK cells and most CD4<sup>+</sup> T cell subsets (Table S10), most  
236 likely due to the high transcriptional similarity between subsets. However, it was able to infer an  
237 increased abundance of cells resembling plasma cells and Tregs as well as decrease of non-classical  
238 monocytes in the CSF of MS patients (Fig. 3A). These results therefore support some of our findings  
239 in this independent cohort of MS patients. Furthermore, this demonstrates that tissue-specific scRNA-  
240 seq can help interpret available bulk-level patient-derived data-sets.

241 The immune cell type(s) causing or promoting MS remain subject of debate. Results from genome-  
242 wide association studies have often been interpreted to reflect T cell-dependent mechanisms driving  
243 MS (39). We therefore systematically evaluated ~170 known genes associated with genetic MS risk  
244 loci (40) against their respective expression levels in the CSF cell clusters we had identified (Fig. 1).  
245 We found that a minority (17%) of MS risk genes were expressed in multiple clusters (e.g. *CD58*, *CD28*,  
246 *TYK2*) (Fig. 3B). Most MS risk genes were instead preferentially expressed in one or two clusters. Such  
247 genes with a ‘cluster-enriched’ pattern were mainly expressed in B cell and plasma cell clusters (19%  
248 of genes, e.g. *CD40*, *CXCR5*, *BACH2*), in NK cells (11% of genes, e.g. *MAPK1*, *TCF7*, *JAK1*), in pDCs  
249 (9%, e.g. *IKZF1*, *IRF8*), and in monocyte and mDCs (22%, e.g. *CD86*, *IFNGR2*). Notably, in CSF cells  
250 only 3% of MS risk genes showed highest expression in the CD4<sup>+</sup> T cell cluster (e.g. *FOXP1*, *SOCS1*,  
251 *IL7R*) and 14% showed enrichment in CD8<sup>+</sup> T cells (e.g. *BATF*, *ETS1*, *IKZF3*) (Fig. 3B). Although  
252 highest expression cannot be equated with highest functional relevance, our data suggest that multiple  
253 immune cell lineages in the CSF can be affected by genetic MS risk. This argues for a multi-lineage  
254 immune etiology of MS – potentially through the interaction of B lineage cells with other cell types.

255

#### 256 *Identifying and interpreting cluster-specific transcriptional changes in MS*

257

258 After exploring the overall changes in the cellular composition of the CSF in MS, we next focused on each  
259 cell cluster individually, testing genes for up-regulation (FDR < 0.05) in MS (Table S4). The complete  
260 CD4<sup>+</sup> T cell (CD4\_Tc) cluster as well as both CD8<sup>+</sup> T cell clusters exhibited an increased expression of

261 MHC class I genes (i.e. *HLA-A*, *HLA-C*, *B2M*) and of *IL32* in MS patients indicating increased activation  
262 (23). In accordance, GSEA (41) showed enrichment of pathways associated with protein synthesis (e.g.  
263 peptide chain elongation;  $P < 0.01$ ) and thus cellular activation in  $CD4^+$  T cells and naïve  $CD8^+$  in MS  
264 (Table S6). The  $CD8^+$  T cell clusters showed higher expression of genes associated with activation and  
265 cytotoxicity (*GZMK*, *GZMA*, *PRF1* encoding perforin 1) and GSEA identified antigen presentation  
266 pathways in activated  $CD8^+$  T cells ( $P < 0.01$ , Table S6). Overall, this suggests higher activation and  
267 cytolytic capacity of cytotoxic CSF cells in MS. Both classical and non-classical monocytes featured higher  
268 expression of genes associated with antigen presentation (e.g. *CD74*, *HLA-DRB1*) and with migration (e.g.  
269 *ITGB2* encoding integrin- $\beta 2$ ). The non-classical monocyte cluster also showed signs of increased secretory  
270 activity (e.g. induction of *GRN* encoding granulin) and GSEA found antigen presentation and interferon  
271 signaling pathways enriched in this cluster ( $P < 0.01$ , Table S6). The mDC cluster showed an increased  
272 expression of MHC class II (i.e. *HLA-DRA*) and MHC class I genes (e.g. *HLA-A*) and induction of CD1E.  
273 This indicates a propensity for lipid antigen presentation. GSEA identified lymphocyte costimulation  
274 pathways in this cluster ( $P < 0.01$ , Table S6). We did not observe statistically significant disease-specific  
275 transcriptional changes in the NK, pDC, and Bc clusters. This may – at least in part – be due to low cell  
276 numbers in these clusters. Because plasma cells were virtually undetected in control patients estimation of  
277 differential expression effect was prohibited. In conclusion, our analysis of transcriptional changes  
278 individually in each cell cluster reflects an ongoing immune cell activation in the CSF in MS.

279

280 *Cell set enrichment analysis helps identifying disease-specific transcriptional changes*

281

282 Our approach above used conventional single-cell analysis steps: 1) identifying cell clusters, 2)  
283 obtaining differentially expressed (DE) genes between disease-states for every cluster, 3) using GSEA  
284 to test for over-representation of known gene-sets and ascribe biological meaning. We speculated that  
285 this approach would be particularly insensitive to gene signatures or cell states that are poorly  
286 represented by tight clustering – as observed in  $CD4^+$  T cell subsets. For example, a certain functional  
287 property may be specific to MS but only be present in a small subset of cells within a cluster; these  
288 patterns could be easily missed in a cluster-wide MS vs. control comparison. We therefore developed a

289 novel procedure – cell set enrichment analysis (CSEA) – which reutilizes the GSEA test for working  
290 on ranked lists of cells rather than genes (Methods, Fig. S7). In this procedure, cells in a cluster are first  
291 ordered by a transcriptional phenotype of interest (e.g., summed expression of genes in a pathway). The  
292 statistical test can then detect cases in which a subset of cells from one group (e.g., MS) exhibit  
293 unusually high or low values of that transcriptional phenotype compared to cells from the second group  
294 (e.g., control). We refer to these exceptional groups of cells as *core cell sets*.

295 We used this technique for a more comprehensive and clustering-free exploration of disease-specific  
296 transcriptional changes in the CD4<sup>+</sup> T cell compartment. As a source for transcriptional phenotype, we  
297 used signature scores from the VISION pipeline (Fig. S7). VISION signature scores are calculated by  
298 summing the expression of specific sets of genes, which can reflect a dichotomy between conditions of  
299 interest (e.g., naïve vs. memory T cell state) or a certain cellular function (e.g., signaling through  
300 interleukin (IL)-2; see Methods). The gene signatures were obtained from databases such as MSigDB  
301 and NetPath (42, 43) and are based on literature curation and on mining of large numbers of published  
302 microarray and RNA-seq studies (Methods).

303 Our CSEA testing procedure returned lists of core cell sets driving statistically significant signature  
304 enrichments in MS ( $P < 0.01$ , Bonferroni adjusted, Table S7). We identified *core MS cell sets* (Methods)  
305 driving enrichments for both an exhausted-versus-naïve CD4 signature (44) and a memory T cell  
306 signature (45) (Fig. S8), both exhibiting considerable overlap with the memory sub-clusters in Figure  
307 2D. Importantly, the memory cell clusters exhibited no significant MS-specific differential abundance  
308 in our standard analysis above, but CSEA highlights a subset of these cells with pronounced memory  
309 or exhausted phenotypes that are particularly abundant in MS CSF. This argues for persistent T cell  
310 activation in the CSF in MS. We further identified several other MS core cell sets with exceptionally  
311 high expression of transcriptional signatures of T helper cell (Th)1 (46), induced (i)Treg (47), and T  
312 follicular helper (TFH) cells (48, 49). Importantly, the cells in each of these three core sets do not  
313 significantly cluster in a transcriptome-wide analysis (VISION consistency testing  $P\text{-value} > 0.1$ ),  
314 suggesting that cluster-based analyses are not well suited for capturing this layer of cell phenotype; e.g.,  
315 cells expressing a Th1-polarized transcriptome are spread across both naive and memory clusters. Our



316 novel analytical approach can therefore decouple clustering of cells from disease-state enrichment of  
317 cells, providing a new framework for interpreting complex scRNA-seq datasets.

318 Overall, these CSEA results emphasize an expansion of CD4<sup>+</sup> T cells with a Treg, Th1, and TFH  
319 phenotype in MS. The Th1 result could indicate a greater role for Th1 versus Th17 in MS disease in the  
320 CSF. Interestingly, TFH cells are known to drive B cell maturation. This lead us to hypothesize that an  
321 increase in TFH abundance is responsible for the differences we observed in the B cell compartment of  
322 the CSF.

323

#### 324 *Expansion of B cell-helping T follicular helper cells in the CSF in MS patients*

325

326 Our unbiased approach had identified MS-specific changes in the CSF: 1) increased numbers of class-  
327 switched B cells, 2) induction of transcriptional indicators of B cell maturation within B cell clusters,  
328 and 3) enrichment of signatures of B cell-helping (50) TFH cells in CSEA. We therefore next tested  
329 whether TFH cells are in fact altered in the CSF in MS. Increased numbers of circulating TFH cells had  
330 previously been described in the blood of MS patients (51, 52). We found the proportion of  
331 CD3<sup>+</sup>CD4<sup>+</sup>CXCR5<sup>+</sup> TFH cells (Fig. 4A) significantly increased in the CSF of MS patients (Fig. 4B and  
332 Table S4). The proportion of activated TFH cells expressing PD-1 and ICOS was also increased in MS  
333 (Fig. 4B) while the alternative CD4<sup>+</sup>CXCR5<sup>+</sup>PD-1<sup>+</sup> subset (53) was unchanged (data not shown)  
334 suggesting that these are *bona fide* TFH cells. The abundance of activated TFH cells positively  
335 correlated with the proportion of CSF plasma cells (Fig. 4C) suggesting that both subsets may be  
336 functionally related in the CSF.

337 Next, we characterized CSF-resident TFH cells in greater detail by performing bulk RNA-sequencing  
338 (Methods) of TFH cells sorted from the CSF of new cohorts of MS patients and controls. MS-specific  
339 transcriptional changes were comparably subtle and no individual genes reached gene-level significance  
340 for differential expression (Table S8). This indicates that numerical differences in TFH cell abundance  
341 are more pronounced than transcriptional changes of TFH cell phenotype. To investigate this further,  
342 we performed GSEA and found an enrichment of gene sets associated with T helper cell memory and  
343 pathogenicity in MS-derived TFH cells ( $P < 0.01$ , Bonferroni correction; Table S9). Genes often



344 recurring in these enriched gene sets (Fig. S9) were associated with cytotoxicity and cell death (e.g.  
345 *GZMA*, *GZMK*, *CASP3*, *CASP4*) and with co-inhibitory function (e.g. *KLRG1*, *TIGIT*, *CTLA4*). In  
346 accordance with our CSEA results, this suggests that pathogenic TFH cells expand in the CSF in MS  
347 patients. TFH cells are essential for the maturation of plasma cells and memory B cells. TFH expansion  
348 may thus contribute to the local interaction between T and B cells and thus potentially drive the disease.  
349

### 350 *TFH cells promote B cell accumulation in the CNS in an animal model of MS*

351

352 As a test to this hypothesis, we next evaluated the *in vivo* functional relevance of TFH cells using a  
353 common animal model of MS. We generated mice with deficiency of Bcl6 – the lineage-defining  
354 transcription factor of TFH cells (50) – restricted specifically to T cells. Such CD4<sup>Cre</sup>Bcl6<sup>fl/fl</sup> mice lack  
355 TFH cells and fail to mount antigen-specific B cell responses, while differentiation of other T helper  
356 cell lineages is unaffected (54) (Fig. S10). The course of EAE – an animal model of MS – has not been  
357 investigated in these mice before. We therefore induced EAE using myelin oligodendrocyte  
358 glycoprotein (MOG)<sub>35-55</sub> peptide. EAE severity was significantly reduced in CD4<sup>Cre</sup>Bcl6<sup>fl/fl</sup> mice  
359 compared to Cre-negative littermates (Fig. 5A). Accordingly, the number of inflammatory lesions and  
360 infiltrated area in the spinal cord of CD4<sup>Cre</sup>Bcl6<sup>fl/fl</sup> mice was lower than in controls (Fig. 5B,C). When  
361 we extracted leukocytes infiltrating the CNS at the peak of EAE we found that the proportion of pro-  
362 inflammatory IL-17 producing CD4<sup>+</sup> T cells was reduced in CD4<sup>Cre</sup>Bcl6<sup>fl/fl</sup> mice indicating a lower  
363 degree of CNS tissue destruction and inflammation in the absence of TFH cells (Fig. 5D). Next, we  
364 tested how the absence of TFH cells influenced B cells in the CNS and found a lower proportion of  
365 total B cells (B220<sup>+</sup>CD3<sup>-</sup>) infiltrating the CNS in CD4<sup>Cre</sup>Bcl6<sup>fl/fl</sup> mice by flow cytometry (Fig. 5E). We  
366 also histologically stained for B cells in the CNS and again found a lower number of intraparenchymal  
367 B cells in the spinal cord of CD4<sup>Cre</sup>Bcl6<sup>fl/fl</sup> mice with EAE compared to Cre-negative littermates (Fig.  
368 5F). Taken together our data indicate that TFH cells enhance MS-like autoimmunity by locally  
369 supporting the expansion of B cells in the CNS.

370

371 **Discussion**

372

373 In this study we applied single-cell transcriptomics to rare and clinically relevant CSF specimen from  
374 MS patients and controls. We thereby create the first comprehensive map of the cellular composition  
375 and transcriptional phenotype of CSF cells. In analysing our data, we observed that – transcriptionally  
376 – CD4<sup>+</sup> T cells are best described as a continuum of cell states rather than clearly defined subsets or  
377 clusters (36). This observation together with considerable inter-donor heterogeneity necessitated  
378 development of CSEA that facilitates extracting disease-specific mechanisms from complex scRNA-  
379 seq data, by focusing (in a data- driven way) on the most relevant subsets of cells. Beyond the specific  
380 application in this paper, we therefore expect that methods such as CSEA will be essential for  
381 conducting future single-cell transcriptomics studies with a case vs. control design.

382

383 Pooling CSEA together with other components of our analysis, we identified a potential multi-lineage  
384 immune aetiology of MS with an expansion of matured B lineage cells, NK cells, and proliferating T  
385 helper cell subsets in the CSF. Transcriptionally, MS-derived cells featured an enrichment of Th1- and  
386 TFH-like signatures, which formed the basis for speculating that TFH cells play a role in MS. In fact,  
387 we found that TFH cells accumulate in the CSF in MS and correlate with plasma cell numbers in  
388 accordance with a previous study (55). We also found that TFH cells promote disease severity and local  
389 B cell expansion in an animal model of MS. In conjunction with a previous study (56), our data provide  
390 strong *in vivo* evidence that a pathological interaction between TFH cells and B cells drives CNS  
391 inflammation. This sequential approach exemplifies how single-cell transcriptomics can be translated  
392 to the bedside and reverse validated in corresponding animal models. By translating technology, we  
393 here identify a new cellular mechanism, locally driving CNS autoimmunity and disability in MS.

394

395 Previous studies have shown that B cell clones at least partially expand in the CSF in MS (27, 57) while  
396 migration from the periphery also occurs (14, 35). An importance of B cells in MS was previously  
397 suggested by the presence of oligoclonal immunoglobulins, by the expansion of plasmablasts in the  
398 CSF (25, 58), and by the efficacy of B cell-depleting therapies in MS (15). However, strong *in vivo* data

399 confirming a functional link between TFH cells and B cells in neuro-inflammation was not previously  
400 reported. Notably, the gene encoding the TFH marker CXCR5 is a genetic risk locus for MS (59).  
401 Previous studies suggest that TFH cells and B cells in the CSF could be derived from meningeal sources.  
402 Chronic ongoing CNS inflammation induces ectopic lymphoid tissue (eLT) in the affected tissue in  
403 many autoimmune diseases and is thought to be the site of local auto-antibody production (60). In MS,  
404 eLT develops in the meninges (61, 62), contains B cells and TFH cells (56, 63), and is located in close  
405 vicinity of degenerating axons and neurons (60, 64–66). It remains to be tested experimentally, whether  
406 CSF and meningeal immune cells communicate and interact.

407

408 Finding controls for CSF-based studies is difficult. The ideal controls would be healthy and matched  
409 for all confounders (67). However, lumbar punctures (LP) cannot be performed for solely scientific  
410 purposes in healthy volunteers. In addition, volunteers in clinical studies are usually males (68) while  
411 MS patients are predominantly female (13). We therefore intentionally used IIH controls, which are  
412 well matched for sex, age and comorbidities (Fig. S1A) and CSF from IIH patients was found normal  
413 in a previous study (26). Even in MS patients an LP is usually performed only once to exclude relevant  
414 differential diagnoses during the diagnostic work-up for a first relapse indicative of MS. We specifically  
415 recruited these *untreated first-relapse* patients for our study. Although this was not part of our formal  
416 inclusion criteria, we thereby enriched for patients currently in (first) relapse. The phenotype of CSF  
417 cells in remission may be different. We also intentionally limited our study to treatment-naïve patients  
418 since many MS treatments considerably impact peripheral or CSF leukocyte composition (69) or  
419 substantially alter the transcriptional profile of immune cells (70). Characterizing treatment effects was  
420 not the focus of the present study. In fact, our study forms a reference point for future CSF  
421 transcriptomics studies in MS patients in other disease stages (e.g. remission or progressive) or while  
422 receiving disease modifying treatments.

423

424 Transcriptional studies in MS were initially performed in unsorted peripheral blood mononuclear cells,  
425 because these are easily accessible (71). Some studies focussed on defined cell populations like T cells  
426 (72), on gender-specific differences (73), or correlated transcriptional findings with genetic information

427 (74). More recent and larger-scale studies also included different MS treatments (75–77), or enriched  
428 for myelin antigen-specific T cells from the blood of MS patients (78). Although these previous studies  
429 have provided important insights into peripheral immune responses in MS, they all feature essential  
430 inherent short-comings: 1) peripheral blood cells constitute a poor surrogate of inflammation in the  
431 brain in MS, 2) transcriptional studies using mixed populations cannot distinguish changes in cell  
432 composition from changes in gene expression per cell, 3) previous enrichment techniques solely  
433 focussed on T cells (78) – a hypothesis driven approach.

434

435 Our study provides the first unbiased and single-cell-resolution look at local immune processes in the  
436 CSF. On a wider perspective, our study demonstrates that scRNA-seq of human CSF cells can generate  
437 novel hypotheses about debilitating neurological diseases that can be validated using reverse-  
438 translational tools. Our study thus forms the basis for a future application of the method in other  
439 neurological diseases such as Parkinson's and Alzheimer's disease.

440

441 **Materials and Methods**

442

443 *Patient recruiting and inclusion*

444 A total of 26 treatment-naive patients with MS or clinically isolated syndrome (CIS) receiving a lumbar  
445 puncture (LP) for diagnostic purposes, were prospectively recruited (Table S1). The control group  
446 consisted of 22 patients diagnosed with idiopathic intracranial hypertension (IIH) (Table S1). Patients  
447 were recruited in three consecutive cohorts. CSF cells from cohort 1 were used for unsorted single-cell  
448 RNA-seq (6 IIH vs. 6 MS patients). CSF cells from cohort 2 were analysed by flow cytometry only (7  
449 IIH vs. 11 MS patients), and cells from cohort 3 were flow sorted for RNA-seq of CD3<sup>+</sup>CD4<sup>+</sup>CXCR5<sup>+</sup>  
450 TFH cells (9 IIH vs. 9 MS patients) (Table S1 and Fig. S1). All patients were of Caucasian ethnicity  
451 and gave written informed consent. The study was performed in accordance with the declaration of  
452 Helsinki and approved by the local ethics committees under reference number 2015-522-f-S.

453 For MS patients, formal inclusion criteria were defined as: 1) treatment naive patients with a first  
454 episode suggestive of MS (i.e. clinically isolated syndrome (CIS)) or with relapsing-remitting (RR)MS  
455 diagnosed based on MAGNIMS criteria (79, 80), 2) patients receiving LP for diagnostic purposes and  
456 consenting to participate. Exclusion criteria for MS patients were defined as: 1) questionable diagnosis  
457 of MS by clinical signs or magnetic resonance imaging (MRI) findings, 2) secondary chronic  
458 progressive MS or primary progressive MS. IIH patients were included, if they gave informed consent.  
459 Exclusion criteria for all patients were: 1) immunologically relevant co-morbidities (e.g. rheumatologic  
460 diseases), 2) severe concomitant infectious diseases (e.g. HIV, meningitis, encephalitis), 3) pregnancy  
461 or breastfeeding, 4) younger than 18 years, 5) mental illness impairing the ability to give informed  
462 consent, 6) artificial blood contamination during the lumbar puncture resulting in >200 red blood cells  
463 /  $\mu$ l. patients whose diagnostic work-up revealed a diagnosis other than MS / IIH within four weeks of  
464 clinical follow-up were retrospectively excluded (Fig. S1C). The following diagnostic tests were  
465 performed in all MS patients to exclude differential diagnoses: PCR for cytomegaly virus, Epstein-Barr  
466 virus, Human Herpes Virus-6, Herpes simplex Virus (HSV)-1, HSV-2 and Varicella-Zoster Virus in  
467 CSF. Blood tests for anti-HAV IgM, HBsAg, anti-HBc, anti-HCV, rheuma factor, Waaler-Rose Test,  
468 anti-cyclic citrullinated peptide (CCP), antinuclear antibody (ANA), anti-double strand (ds)DNA

469 antibodies, antineutrophil cytoplasmic antibodies (ANCA). CSF and serum were tested by the  
470 Treponema pallidum hemagglutination assay (TPHA). Borrelia burgdorferi was detected in CSF and  
471 blood by ELISA. R version 3.4.4 and RStudio 1.1.447 were used for the analysis of clinical and human  
472 flow cytometry data.

473

#### 474 *Sampling and flow cytometry analysis of cerebrospinal fluid cells*

475 LPs were performed under sterile conditions using 20G Sprotte Canulae (Pajunk Medical). Up to 5 ml  
476 of CSF and 3 ml of blood were collected for scientific purposes in addition to diagnostic material. All  
477 samples were pseudonymised at collection. CSF was transported to further processing as quickly as  
478 possible and centrifuged at 300g for 10 min. The supernatant was removed and CSF cells were  
479 resuspended in 5 ml of X-Vivo15 media (Lonza) and stored at 4°C until further processing. CSF flow  
480 cytometry was performed in all donors using a Navios flow cytometer (Beckman Coulter). Cells were  
481 incubated in VersaLyse buffer and stained using the following anti-human antibodies (Beckman  
482 Coulter; clone names indicated): CD3 (UCHT1); CD4 (13B8.2); CD8 (B9.11); CD14 (RMO52); CD16  
483 (3G8); CD19 (J3-119); CD45 (J.33); CD56 (C218); CD138 (B-A38).

484 For scRNA-seq, CSF cells in media were centrifuged at 400 g for 5 min and resuspended in 40 µl of X-  
485 Vivo15 media. 5 µl of the single-cell suspension was manually counted in a Fuchs-Rosenthal chamber.  
486 The maximum of CSF cells used for input was 10,000 cells. If total available CSF cell numbers were  
487 lower than 10,000 cells, all available cells were processed. On average 5,917 cells ± 1,505 SD (control  
488 6,167 cells ± 2,614 SD vs. MS 5,667 cells ± 1,506 SD) CSF cells were used as input per donor.

489 A summed composite score differentiating flow cytometry results of MS from control patients was  
490 calculated. First, for each sample analysed by flow cytometry four ratios were calculated: 1) proportion  
491 of NK to CD4<sup>+</sup> T cells, 2) Bc to CD4<sup>+</sup> T cells, 3) CD8<sup>+</sup> to CD4<sup>+</sup> T cells, and 4) CD14<sup>+</sup>CD16<sup>-</sup> to  
492 CD14<sup>+</sup>CD16<sup>+</sup> monocytes. Each resulting group average was normalized to a value of 1 by dividing  
493 individual values by the group average. These four normalized ratios were added to obtain a basic  
494 composite score. A value of 1 was added to the basic composite in each case that an elevated  
495 immunoglobulin index or oligoclonal bands were detected in the samples; i.e. a maximum of 2 was  
496 added to the basic score. This extended composite score was named 'Münster MS composite' score.

497 Receiver operator curve (ROC) analysis of the composites was performed and the area under the curve  
498 (AUC) was calculated using the `Glm` and `rocplot` functions of the `Deducer` package v0.7-9 in R.

499

#### 500 *Generation of single-cell libraries and sequencing*

501 Single-cell suspensions were loaded onto the Chromium Single Cell Controller using the Chromium  
502 Single Cell 3' Library & Gel Bead Kit v2 (both from 10X Genomics) chemistry following the  
503 manufacturer's instructions. Sample processing and library preparation was performed according to  
504 manufacturer instructions using AMPure beads (Beckman Coulter). Sequencing was carried out on a  
505 local Illumina Nextseq 500 using the High-Out 75 cycle kit with a 26-8-0-57 read setup. Average  
506 sequencing depth was  $51,064 \pm 13,041$  SEM reads/cell (Table S3).

507

#### 508 *Preprocessing of sequencing data*

509 The analysis pipeline for scRNA-seq data is illustrated in Fig. S11. Processing of sequencing data was  
510 performed with the *cellranger* pipeline v2.0.2 (10X Genomics) according to the manufacturer's  
511 instructions. Raw bcl files were de-multiplexed using the *cellranger mkfastq* pipeline. Subsequent read  
512 alignments and transcript counting was done individually for each sample using the *cellranger count*  
513 pipeline with standard parameters. The *cellranger aggr* pipeline was employed, to ensure that all  
514 samples had the same number of confidently mapped reads per cell. The *cellranger* computations were  
515 carried out at the High Performance Computing Facility of the Westfälische Wilhelms-University  
516 (WWU) Münster. The pre-quality control (QC) total number of cells with available scRNA-seq profiles  
517 was 22,357 with an average of  $3,176.3 \pm 3,246.2$  SD individual cells available per control donor and  
518  $2,413.0 \pm 1,198.7$  SD individual cells available per MS donor (Table S3). This corresponds to an  
519 average cell recovery rate of  $48.8\% \pm 27.5\%$  SD compared to input cells (control  $46.1\% \pm 33.1\%$  vs  
520 MS  $51.6\% \pm 32.0\%$ )

521

#### 522 *Single-Cell Sample Filtering*

523 Initial exploratory data analysis identified one MS sample and one IIH sample whose clustering did not  
524 overlap with other samples (data not shown). This tight clustering suggested either strong batch effects



525 or significant contamination. Both samples were excluded from further analysis, leaving 5 control- and  
526 5 MS-derived samples.

527 Nine barcode-level quality control (QC) metrics were computed for the unfiltered 10x Cell Ranger  
528 output: (1) number of unique molecular identifiers (UMIs), (2) number of reads, (3) mean reads per  
529 UMI, (4) standard deviation of reads per UMI, (5) percent of reads confidently mapped to the gene, (6)  
530 percent of reads mapped to the genome but not a gene, (7) percent of reads unmapped, (8) percent of  
531 UMIs corrected by the Cell Ranger pipeline, and (9) the number of cell barcodes corrected by the Cell  
532 Ranger pipeline. These metrics were used for filtering and normalization. We applied the gene and  
533 sample filtering using a scheme previously described (81). This involved four steps:

- 534 1. Define *common genes* based on UMI counts: Genes with  $n_u$  or more UMIs in at least 25% of  
535 barcodes, where  $n_u$  is the upper-quartile of the non-zero elements of the UMI matrix.
- 536 2. Filter samples based on QC metrics. Remove samples with low numbers of reads, low  
537 proportions of mapped reads, or low numbers of detected common genes. The threshold for  
538 each measure is defined data-adaptively: A sample may fail any criterion if the associated  
539 metric under-performs by  $z_{cut}$  standard deviations from the mean metric value or by  $z_{cut}$  median  
540 absolute deviations from the median metric value. Here we have used  $z_{cut} = 2$ . This function is  
541 implemented in `scone::metric_sample_filter` (see below).
- 542 3. Remove barcodes from donors with fewer than 100 barcodes following sample filtering. These  
543 donors have contributed too few high-quality samples to reliably estimate donor-specific  
544 effects. Only seven cells were removed in this step.
- 545 4. Filter genes based on UMI counts: Genes with  $n_u$  or more UMIs in at least  $n_s$  barcodes, where  
546  $n_u$  is the upper-quartile of the non-zero elements of the sample-filtered UMI matrix. We have  
547 set  $n_s = 5$  to accommodate markers of rare populations. This sub-step ensures that included  
548 genes are detected in a sufficient number of samples after sample filtering. For the CD4<sup>+</sup>-only  
549 analysis this step was applied again after the data matrix was subset to include only CD4<sup>+</sup>  
550 clusters.

551

552



553 *Single-Cell Normalization*

554 We utilized the SCONE package (81) to select an appropriate normalization based on a standardized  
555 panel of performance criteria. Clustering and Correlation evaluations were based on principal  
556 component analysis (PCA)-based dimensionality reduction to ten principal components.

557 *Scaling normalization:* We included a number of scaling methods with wrappers implemented in the  
558 SCONE package, including: no normalization, total count normalization, trimmed mean of M-values  
559 normalization method (TMM) normalization, upper quartile normalization, full quantile normalization,  
560 and the relative log expression normalization.

561 *Categorical covariates:* We considered normalization procedures that include a linear regression-based  
562 batch adjustment for log-transformed expression data. For our purposes we considered the donor ID as  
563 a batch covariate. Normalized matrices were scored for batch mixing using the SCONE batch silhouette  
564 score. We also monitored the silhouette score of MS vs. control status, although we never explicitly  
565 included this categorical biological covariate as part of the adjustment model. The stratified Partitioning  
566 Around Medoids (PAM) argument was applied to the evaluation of *de novo* PAM clusters, considering  
567 a range of  $K$  from 2 to 8.

568 *Control genes:* Positive controls were selected from the top 500 most common gene symbols referenced  
569 in the Molecular Signatures Database (MSigDB) C7 collection of immunological signatures (42).  
570 Negative controls were selected from a previous study (82). In order to match sets for mean expression,  
571 genes were binned according to the rounded mean  $\log_2$  expression (adding 1 to each observation). Genes  
572 for the positive control set, and two negative control gene sets (adjustment and evaluation) were drawn  
573 in equal numbers (maximum) from each expression bin, for a total of 207 genes each. For the CD4<sup>+</sup>-  
574 only analysis the lists were slightly smaller at 196 genes each.

575 *Unwanted variation:* We performed adjustment based on principal components (PC) of the QC (named  
576 qPC). Such qPC-based adjustment involved regression on PCs of the QC metrics discussed above. We  
577 also performed the remove unwanted variation (RUV) normalization strategy (83). Both RUVg and  
578 qPC adjustments considered by SCONE were performed over a range of 0 to 8 factors.

579 *Selected normalizations:* The top performing normalizations for both the full analysis and CD4<sup>+</sup>-only  
580 analysis both involve relative log expression scaling, qPC-based adjustment, and batch adjustment. For

581 the full analysis this normalization included all eight qPCs, whereas the T cell analysis included only  
582 four.

583

#### 584 *Seurat Analysis*

585 After sample filtering, we loaded the normalized log-transformed UMI matrix into the Seurat analysis  
586 pipeline (84). Following data scaling and PCA, we clustered the cells in the first ten principal  
587 components using the *Seurat::FindClusters* function. Clustering resolution was set to 0.6. Identical  
588 options were used for the CD4<sup>+</sup>-only Seurat analysis (see below), defining subclusters of those cells.  
589 We manually annotated clusters based on marker gene expression and enrichment analyses described  
590 below. t-distributed stochastic neighbour embedding (t-SNE) data representations were computed using  
591 the fast option in *Seurat::RunTSNE*.

592

#### 593 *VISION Analysis*

594 We passed raw and normalized UMI data to the VISION pipeline  
595 (<https://github.com/YosefLab/VISION>) (37). Mean expression per gene symbol was calculated prior to  
596 the analysis in order to make the features relatable to general gene signatures. The goal of FastProject  
597 analysis – on which VISION is based – is to uncover biologically meaningful gene signatures that vary  
598 coherently across single-cell neighbourhoods (37). These signatures can help assign meaning to the  
599 dominant expression differences between clusters. In addition to raw data, we passed QC, donor, status,  
600 and Seurat cluster covariates for exploratory analysis and visualization. VISION quantifies the extent  
601 to which cell signature values cluster across the cell manifold by using “consistency testing.” VISION  
602 scores the extent to which neighbouring cells (similar expression profiled) are predictive of a cell’s  
603 signature value using autocorrelation (Giri’s C) statistics, comparing against random permutations in  
604 order to assign statistical significance with respect to a uniform null model. We also included the Seurat  
605 t-SNE as a precomputed projection. Our signature set includes:

- 606 1. Human cell cycle genes described before (2), representing sets of genes marking G1/S, S,  
607 G2/M, M, and M/G1 phases.
- 608 2. The MSigDB C7 immunological signature collection (42).

609 3. T<sub>H</sub> signatures compiled previously (46).

610 4. NetPath database signatures (43).

611 5. Curated T cell signatures (36).

612 6. Curated T<sub>FH</sub> (48, 49) signature sets.

613 Housekeeping genes were referenced from the same source as the SCONE negative controls above (82).

614

615 *Comparing gene expression and cluster composition between MS patients versus controls*

616

617 *Differential Composition Analysis*

618 For both the initial and the CD4<sup>+</sup>-only clustering, we used *limma::voom* (85) to test the difference in

619 cluster abundances (cell counts) between MS donors and control donors.

620 Binomial regression modelling was applied to compare the relative sampling of classical and non-

621 classical monocytes in monocyte fraction of MS and control CSF samples. The classical fraction of

622 monocytes increased significantly from 17% in control donors to 32% in MS donors (Wald test  $P < 10^{-$

623 <sup>8</sup>).

624 *Cluster-specific expression analysis*

625 We performed one versus all comparisons following each clustering analysis in order to annotate the

626 clusters. One versus all differential expression (DE) tests  $P$ -values were used to rank genes by the extent

627 they are up-regulated in one cluster over all others. Tests were performed separately for each donor

628 sample with at least 10 cells in the target cluster. qPC factors used for normalization above were

629 incorporated into a linear predictor for limma-voom DE testing. Results for each donor sample were

630 combined in multiple ways, calculating median log fold changes, meta-analysis  $P$ -values for one-sided

631 tests using Stouffer's method, and irreproducible discovery rates (IDR) (86) for two-sided tests using

632 the est.IDRm tool in the scRAD package (87) for all genes and comparisons (Table S4). Examples of

633 reproducible marker RNAs (FDR < 0.05, IDR < 0.05, and median FC > 2-fold) for the initial clustering

634 can be found below:

635

| Cluster (ID)                                | Marker RNA Gene Symbol   |
|---------------------------------------------|--------------------------|
| B cell (Bc)                                 | CD79A, MS4A1             |
| Plasma cell (plasma)                        | CD79A, XBP1              |
| CD4 <sup>+</sup> T cell (CD4_Tc)            | IL7R                     |
| Naïve CD8 <sup>+</sup> T cell (nCD8_Tc)     | NKG7, CCL5               |
| Activated CD8 <sup>+</sup> T cell (aCD8_Tc) | NKG7, CCL5, GZMK         |
| Natural killer cell (NK)                    | NKG7, GNLY               |
| Plasmacytoid dendritic cell (pDC)           | CLEC4C                   |
| Myeloid dendritic cell (mDC)                | LYZ, FCER1A, CD1C        |
| Classical monocyte (class_mono)             | LYZ, CD14, S100A9        |
| Non-classical monocyte (nc_mono)            | LYZ, CD14, FCGR3A, MS4A7 |

636

637 After re-clustering the CD4<sup>+</sup> T cell cluster (CD4\_Tc), the marker criteria above identified contaminating  
 638 populations with markers of non CD4<sup>+</sup> T cell lineages. These cells were erroneously clustered together  
 639 with CD4<sup>+</sup> T cells in the initial clustering and we named them remaining CD8<sup>+</sup> T cells (r-CD8) and  
 640 remaining monocytes (r-mono).

641

| Tc Contaminant Cluster (ID)               | Marker RNA Gene Symbol                    |
|-------------------------------------------|-------------------------------------------|
| Remaining CD8 <sup>+</sup> T cell (r-CD8) | NKG7, CCL5                                |
| Remaining monocytes (r-mono)              | LYZ, FCER1A, CD1C, CD14, FCGR3A,<br>MS4A7 |

642

643 Remaining CD4<sup>+</sup> subclusters were annotated by joint considerations of i) significant (FDR < 0.05) and  
 644 large log2 fold change greater than 0.1 and ii) Mean expression of known markers (Fig. 2F).

645 *Per cluster case-control comparison*

646 Cluster-specific gene expression differences between MS and control were also assessed. Donors were  
 647 only included in a comparison if 10 or more cells from the target cluster were detected in the donor's

648 sample. All pairings of MS donors with control donors were considered (up to 16). For each valid case-  
649 control pair, DE analysis was performed using limma-voom, as in the marker analysis, but comparing  
650 case cells against control cells. Log fold change was summarized by the median of log fold changes  
651 estimated across the donor pairs. Meta-analysis was performed on all possible pairings of cases and  
652 controls (up to  $4! = 24$ ); the median meta-analysis P-value was reported. IDR modelling was applied at  
653 the pair level, modelling the reproducibility of up to 16 replicate significance signals (Table S4). Some  
654 genes are very lowly expressed across individual clusters, resulting in unstable statistical estimation for  
655 those genes. Genes were filtered before DE if they had mean un-normalized UMI counts below 0.05.

656

#### 657 *Gene Set Enrichment Analysis (GSEA)*

658 After deriving lists of differentially expressed genes, we sought to uncover enrichment for particular  
659 gene sets to capture biological differences between samples. We applied GSEA tests (41) to all single-  
660 cell differential expression tests returning cluster specific gene expression (i.e. genes expressed by one  
661 cluster vs. other clusters, Table S5) and disease specific gene expression (i.e. genes expressed within  
662 one cluster in MS cells vs. control cells, Table S6). We used signed significance scores based on meta-  
663 analysis P-values as gene signals and applied the Bonferroni adjustment to control the FWER for each  
664 category of hypotheses (i.e. test type, cluster, and sign). Sets considered in this analysis include all  
665 MSigDB C7 signature sets and all curated T cell signature sets described previously (36) with 10 or  
666 more genes quantified in the present study; “UP” and “DN” signature subsets were tested separately.  
667 The initial description of GSEA recommend simulating a null distribution for the GSEA test statistic at  
668 the gene level (e.g. recomputing lfc for shuffled sample labels) (41). This approach is computationally  
669 costly in our case; in this analysis we generated null distributions of the GSEA test statistic by shuffling  
670 gene set memberships, assigning empirical one-sided P-values based on simulation ([https://CRAN.R-](https://CRAN.R-project.org/package=gsEasy)  
671 [project.org/package=gsEasy](https://CRAN.R-project.org/package=gsEasy)).

672

#### 673 *Cell Set Enrichment Analysis (CSEA)*

674 For the CD4<sup>+</sup>-only analysis we considered a novel adaptation of the GSEA method, applying the  
675 technique to cell sets: CSEA (illustrated in Fig. S7). CSEA is a hypothesis testing method for

676 simultaneously uncovering enrichments and identifying subsets of cell sets of importance. In this  
677 procedure, a collection of cells is first ordered by a transcriptional phenotype of interest (e.g., sum  
678 expression of genes in a pathway). The resulting statistical test is sensitive to cases in which only a  
679 subset of cells from one group (e.g., MS) exhibit unusually high or low values of the transcriptional  
680 phenotype. The input to this method is a list of  $N$  cells, rank-ordered by some input signal. Our analysis  
681 uses VISION signature scores, reflecting known axes of biological variation. VISION signature scores  
682 – based on FastProject signature scores (37) – are computed by first centering and scaling each  
683 normalized log expression cell profile. Following scaling, the sum of gene expression values in the  
684 negative signature subset are subtracted from the sum of gene expression values in the positive signature  
685 subset. Signatures are normalized to the total number of genes in the set. For example, a signature set  
686 that describes a dichotomy between naïve and memory T cells may be used to score individual cells,  
687 indicating that some cells have higher expression of genes characterizing the naïve state and lower  
688 expression of genes characterizing the memory state. Using the notation previously described (41) we  
689 will use  $r_j$  to denote the cell  $j$ 's signature score; indices have been sorted so that  $r_j > r_{j+1}$  (alternatively in  
690 increasing order:  $r_j < r_{j+1}$ ). The test involves considering all cells up to a specific position,  $i$ . A “hit”  
691 score is defined as the cumulative sum of signature score magnitudes (optionally exponentiated by  
692 parameter  $p$ :  $|r_j|^p$ ) for members of cell set  $S$ , divided by the sum over all set members in the list. A “miss”  
693 score is similarly calculated for non-members of  $S$ , but without weighing by signature score magnitudes.  
694 The CSEA enrichment score (ES) is defined as the maximum of the difference between the running hit  
695 score and running miss score with respect to index  $i$ . When  $p=0$ , the ES reduces to a one-sided KS test  
696 statistic for differential signature analysis between cell sets. We apply the same permutation scheme as  
697 described for GSEA above. For  $p>0$ , CSEA cannot be seen as a simple differential signature test: CSEA  
698 tests for enrichment of a cell set at the high tail (or low tail) of the signature score distribution, but  
699 additionally weighs the set elements according to their signature value. This reduces the effects of low-  
700 magnitude cells in  $S$ , whereas all cells not in  $S$  are treated the same no matter the magnitude of their  
701 signature score. CSEA tests if high magnitude (positive or negative) cells are enriched at a specific tail,  
702 applying permutation tests to account for the additional variability induced by the magnitude weights.  
703 The set of indices up to where the objective score reaches its maximum also holds significance – in

704 GSEA (41) referred to as the “leading-edge” of the enrichment test. The intersection of the set  $S$  and  
705 the leading-edge is the *leading-edge subset*, representing an important core subset of cells driving an  
706 enrichment. For each VISION signature, we treated the computed signature scores as cell signature  
707 scores  $r_j$ . The sets under consideration were the mutually exclusive sets of MS and control cells. The  
708 goal of this approach is to identify core sets of cells that drive each biological condition's enrichment  
709 for high or low signature values (Fig. S7). Contaminating sub-populations in the CD4\_Tc cluster, were  
710 removed prior to CSEA.

711

#### 712 *Bulk RNA-Seq of sorted TFH cells*

713 CSF TFH cells were sorted on a BD FACS Aria™ III cell sorter using FACS Diva™ software following  
714 manufacturer's instructions using an 85  $\mu\text{m}$  nozzle and the drop delay was determined using BD  
715 Accudrop™ beads. Sorting was performed using sort precision mode “purity” for live  
716 CD3<sup>+</sup>CD4<sup>+</sup>CXCR5<sup>+</sup> cells. Antibodies against PD-1 (EH12.2H7) and ICOS (C398.4A) were from  
717 Biologend. Cells were sorted directly into 1,5 ml reaction tubes containing 100  $\mu\text{l}$  RNA Lysis Buffer  
718 (Zymo Research). After sorting, tubes were vortexed, briefly centrifuged and frozen at -80 °C until  
719 RNA isolation. Data were analyzed using FlowJo software v10.4.1 (Tree Star, Inc.). Samples for bulk  
720 RNA-sequencing were prepared using a modified version of the SmartSeq2 protocol (88). Unquantified  
721 purified RNA was used as input. Reaction volumes were scaled up and the number of PCR cycles during  
722 cDNA amplification adjusted accounting for the higher number of input cells compared to the original  
723 protocol (88). Library Preparation was done by the Next UltraII FS DNA Library Prep Kit (New  
724 England Biolabs) using 1-3 ng of cDNA as input. Sequencing for 9 MS samples and 9 IHH samples was  
725 carried out on a NextSeq500 using the High-Output 75 cycle kit (Illumina).

726

#### 727 *Bulk expression quantification*

728 RNA-seq reads were aligned to the RefSeq hg38 transcriptome (GRCh38.2) using Bowtie2 (89). The  
729 resulting transcriptome alignments were processed using the RNA-Seq by Expectation Maximization  
730 (RSEM) toolkit to estimate expected counts over RefSeq transcripts (90). Several genes were quantified  
731 multiple times due to alternative isoforms unrelated by RefSeq annotation. Before expression data



732 normalization, the gene entry with maximum counts was selected to represent the gene in further  
733 analysis.

734

#### 735 *Bulk data filtering*

736 Sample and gene filtering were similar to the scRNA-seq filtering method above, enforcing ( $> 107k$   
737 reads,  $> 10\%$  read alignment (forced),  $> 93.3\%$  common genes detected; corresponding to  $z_{cut} = 20$ ). A  
738 total of 5 samples were removed, leaving 13 samples. Setting  $n_s = 1$ , we analysed 11,383 genes below.  
739 For each sample, we computed transcriptome alignment and quality metrics using FastQC (Babraham  
740 Bioinformatics), Picard tools (Broad Institute), and custom scripts. Computed metrics included: (1)  
741 number of reads; (2) number of aligned reads; (3) percentage of aligned reads; (4) number of duplicate  
742 reads; (5) primer sequence contamination; (6) average insert size; (7) variance of insert size; (8)  
743 sequence complexity; (9) percentage of unique reads; (10) ribosomal read fraction; (11) coding read  
744 fraction; (12) UTR read fraction; (13) intronic read fraction; (14) intergenic read fraction; (15) mRNA  
745 read fraction; (16) median coefficient of variation of coverage; (17) mean 5' coverage bias; (18) mean  
746 3' coverage bias; and (19) mean 5' to 3' coverage bias.

747

#### 748 *Bulk data normalization, unsupervised, and supervised analysis*

749 Data were normalized using SCONE. 569 positive controls were derived from MSigDB C7 entries  
750 annotated to include TFH cell types, including the most frequently included gene symbols in those  
751 entries. Negative controls for RUVg and evaluation were derived from the housekeeping gene list.  
752 Control lists were sampled down to 186 genes per list so as to match mean expression of genes in each  
753 list. The study group included two batches with 4/3 and 3/3 MS/IIH samples respectively. Biological  
754 condition was used only for evaluation. SCONE recommended TMM scaling and adjustment for 2  
755 factors of RUVg and batch condition.

756 We performed PCA on the scaled log-transformed normalized data for visualization. DE between MMS  
757 and IIH donors was performed with limma-voom, using RUVg factors and batch in the model to adjust  
758 for unwanted variation. Per-gene DE significance scores were computed from log-transformed  $P$ -values  
759 and used for GSEA enrichment testing. Sets considered for testing included numbers 3,5, and 6



760 described in the VISION section. The 42 most frequent core members of the significant enrichments  
761 (Bonferroni adjusted  $P$ -value less than 0.01) – genes driving 7 or more of these enrichments – were  
762 selected and their normalized log values were correlated against each-other and represented in a sorted  
763 heatmap using *pheatmap* defaults.

764

#### 765 *Expression deconvolution using scRNA-seq data*

766 Raw UMI mean counts per cluster were used as input for deconvolution. Cibersort was used for RNA  
767 expression deconvolution (38) on the E-MTAB69 dataset described previously (19). We found that  
768 when using highly similar cell clusters as input for deconvolution (e.g., CD4\_Tc together with CD4<sup>+</sup> T  
769 cell sub-clusters) lower abundance clusters (e.g., CD4<sup>+</sup> T cell sub-clusters) were not identified due to  
770 high transcriptional overlap. We therefore excluded the CD4\_Tc cluster from deconvolution. A  
771 customized RNA signature was extracted based on the scRNA seq data (no quantile normalization,  
772 permutations 100,  $Q$ -value 0.1). UMI were transformed for correlation with microarray expression  
773 ( $x = \log_2(y+2) * 1.5$ ). Only correlations with  $p < 0.05$  were used. The resulting signature contained 91  
774 genes. A deconvolution of the original scRNAseq data served as control, and showed a specific  
775 detection of all cell types ( $> 0.90$  pearson correlation). To test for significant differences in estimated  
776 RNA abundance between clusters, one-way ANOVA with Tukey's Multiple Comparison test was used.  
777

#### 778 *Mice and EAE induction*

779 CD4<sup>Cre</sup> mice (91) and B6.129S(FVB)-*Bcl6*<sup>tm1.1Dent/J</sup> (named Bcl6<sup>flox</sup> or Bcl6<sup>fl/fl</sup>) mice (54) were  
780 purchased from the Jackson laboratories. The CD4<sup>Cre</sup>Bcl6<sup>flox</sup> strain was maintained by breeding the  
781 Bcl6<sup>flox</sup> allele to homozygosity (i.e. Bcl6<sup>fl/fl</sup>) and breeding the Cre alleles in heterozygous to wildtype  
782 matings. Genotyping was done by routine PCR from ear punch DNA. All animal experiments were  
783 approved by the responsible state authorities (LANUV NRW) under reference number 84-  
784 02.04.2015.A319 and were performed in accordance with local regulations. Mice of both sexes (8-14  
785 weeks old) were immunized s.c. in the flanks with an emulsion containing the myelin oligodendrocyte  
786 glycoprotein (MOG) peptide MOG<sub>35-55</sub> (150  $\mu$ g/mouse) (GL Biochem (Shanghai) Ltd) and *M.*  
787 *tuberculosis* H37Ra extract (5 mg/ml, BD) in CFA (200  $\mu$ l/mouse). Pertussis toxin (250 ng/mouse,

788 Sigma) was administered intraperitoneally on days 0 and 2. Mice were monitored daily and assigned  
789 grades for clinical signs of EAE using the following scoring system: 0, healthy; 1, paralyzed tail tip; 2,  
790 paralyzed tail; 3, waddling; 4, hind legs drag on the ground; 5, butt on the ground; 6, one paralyzed hind  
791 leg; 7, both paralyzed hind legs; 8, one paralyzed front leg (criterium to stop EAE); 9, both paralyzed  
792 front legs; 10, moribund or death. Detailed refinement procedures were performed according to the  
793 impairments of the mice. Mice with a score of >7 were euthanized. GraphPad Prism 5 was used for  
794 statistical analysis of all mouse-related data.

795

#### 796 *Isolation of CNS-infiltrating mononuclear cells*

797 Mice were intracardially perfused with cold PBS under ketamin/xylazin anesthesia. The forebrain and  
798 cerebellum were dissected and spinal cords flushed out from the spinal canal with hydrostatic pressure.  
799 CNS tissue was cut into pieces and digested with collagenase D (2.5 mg/ml, Roche Diagnostics) and  
800 DNase I (0.05 mg/ml, Sigma) at 37 °C for 20 min. Mononuclear cells were isolated by passing the tissue  
801 through a 70 µm cell strainer, followed by a 70%/37% percoll gradient centrifugation. The interphase  
802 was removed, washed and re-suspended in culture medium containing 20 ng/ml PMA, 500 ng/ml  
803 ionomycin, GolgiStop, GolgiPlug (BD, each 1:1000 diluted). After 4 hours of incubation at 37 °C, cells  
804 were stained at RT for 30 min with anti-mouse antibodies (Biolegend, clones indicated): CD3 (17A2),  
805 CD4 (RM4-5 or GK1.5), B220 (RA3-6B2) and live/dead staining “Zombie NIR” (BD; 1:500) in PBS.  
806 Cells were fixed with the BD Cytotfix/Cytoperm kit according to manufacturer instructions and stained  
807 with IL-17A (eBiosciences, eBio17B7) and IFN $\gamma$  (BD, XMG1.2) each 1:100 diluted at 4°C for 30 min.  
808 Cells were washed and analysed using a Gallios flow cytometer (Beckman Coulter) and analysed using  
809 FlowJo V10.

810

#### 811 *Histology*

812 For histology, mice were intracardially perfused with 20 ml cold PBS under ketamin/xylazin anesthesia  
813 and fixed by perfusion with 10 ml of 4 % paraformaldehyde (PFA). Spinal cord and spleen were  
814 removed and kept in PFA for 48 hours at 4 °C. The fixed spinal cords were cut into 3 mm thick  
815 transverse segments and embedded in paraffin. To evaluate demyelination, spinal cord sections were

816 stained with Luxol Fast Blue (LFB) and subsequently incubated with Periodic acid-Schiff (PAS).  
817 Immunohistochemistry was performed using the biotin-streptavidin peroxidase technique (K5001,  
818 Dako) in an immunostainer (AutostainerLink 48, Dako). Sections were pre-treated in a steamer  
819 (treatment solutions pH 6.0 or pH 9.0 (Dako)) before incubation with the primary antibodies against  
820 CD3 (clone CD3-12, BioRad, 1:100) or Mac3 (clone M3/84, BD, 1:100) or B220 (clone RA3-6B2, BD,  
821 1:200). DAB was used as a chromogen. Stained sections were analysed with a keyence microscope and  
822 pictures were taken with an Axioplot camera. ImageJ v1.48 was used to manually count infiltrated cells  
823 and measure areas.  
824

825 **Supplementary Materials**

826

827 Fig. S1. Patient characteristics

828 Fig. S2. Average and individual proportions of cell clusters of scRNA-seq samples

829 Fig. S3. Flow cytometry characterization of all CSF cell samples

830 Fig. S4. Late B lineage cells accumulate in the CSF in MS

831 Fig. S5. Evaluating a composite score for diagnosing MS by CSF analysis

832 Fig. S6. CD4<sup>+</sup> T cells are transcriptionally defined by a continuum

833 Fig. S7. Scheme of GSEA/VISION/CSEA Analysis

834 Fig. S8. Cell set enrichment analysis helps identifying disease-specific transcriptional changes

835 Fig. S9. RNA bulk-seq of TFH cells

836 Fig. S10. Bcl6 deficiency does not affect in vitro T helper cell differentiation

837 Fig. S11. Workflow of scRNA-seq analysis

838 Table S1. Summarized information about patients in the present study

839 Table S2. Standard CSF parameters and MS disease features of patients in the present study

840 Table S3. Technical information of scRNA-seq results

841 Table S4. Merged results of the scRNA-seq analysis

842 Table S5. Gene set enrichment analysis (GSEA) results for genes differentially expressed by clusters

843 Table S6. Gene set enrichment analysis (GSEA) results for genes differentially expressed in MS vs.

844 control samples

845 Table S7. VISION and Cell set enrichment analysis (CSEA) results for T cell signatures

846 Table S8. Flow sorting related information

847 Table S9. Differentially expressed genes and gene set enrichment analysis (GSEA) in CSF-derived TFH

848 cells in MS vs. control patients

849 Table S10. Deconvolution results

850

851

852 **References**

853

- 854 1. A. M. Klein, L. Mazutis, I. Akartuna, N. Tallapragada, A. Veres, V. Li, L. Peshkin, D. A. Weitz,  
855 M. W. Kirschner, Droplet barcoding for single-cell transcriptomics applied to embryonic stem cells,  
856 *Cell* **161**, 1187–1201 (2015).
- 857 2. E. Z. Macosko, A. Basu, R. Satija, J. Nemesh, K. Shekhar, M. Goldman, I. Tirosh, A. R. Bialas, N.  
858 Kamitaki, E. M. Martersteck, J. J. Trombetta, D. A. Weitz, J. R. Sanes, A. K. Shalek, A. Regev, S. A.  
859 McCarroll, Highly parallel genome-wide expression profiling of individual cells using nanoliter  
860 droplets, *Cell* **161**, 1202–1214 (2015).
- 861 3. J. Park, R. Shrestha, C. Qiu, A. Kondo, S. Huang, M. Werth, M. Li, J. Barasch, K. Suszták, Single-  
862 cell transcriptomics of the mouse kidney reveals potential cellular targets of kidney disease., *Science*  
863 **360**, 758–763 (2018).
- 864 4. I. Tirosh, A. S. Venteicher, C. Hebert, L. E. Escalante, A. P. Patel, K. Yizhak, J. M. Fisher, C.  
865 Rodman, C. Mount, M. G. Filbin, C. Neftel, N. Desai, J. Nyman, B. Izar, C. C. Luo, J. M. Francis, A.  
866 A. Patel, M. L. Onozato, N. Riggi, K. J. Livak, D. Gennert, R. Satija, B. V. Nahed, W. T. Curry, R. L.  
867 Martuza, R. Mylvaganam, A. J. Iafrate, M. P. Frosch, T. R. Golub, M. N. Rivera, G. Getz, O.  
868 Rozenblatt-Rosen, D. P. Cahill, M. Monje, B. E. Bernstein, D. N. Louis, A. Regev, M. L. Suvà,  
869 Single-cell RNA-seq supports a developmental hierarchy in human oligodendroglioma, *Nature* **539**,  
870 309–313 (2016).
- 871 5. E. Azizi, A. J. Carr, G. Plitas, A. E. Cornish, C. Konopacki, S. Prabhakaran, J. Nainys, K. Wu, V.  
872 Kiseliovas, M. Setty, K. Choi, R. M. Fromme, P. Dao, P. T. McKenney, R. C. Wasti, K. Kadaveru, L.  
873 Mazutis, A. Y. Rudensky, D. Pe'er, Single-Cell Map of Diverse Immune Phenotypes in the Breast  
874 Tumor Microenvironment, *Cell* (2018), doi:10.1016/J.CELL.2018.05.060.
- 875 6. A. Giladi, I. Amit, Single-Cell Genomics: A Stepping Stone for Future Immunology Discoveries,  
876 *Cell* **172**, 14–21 (2018).
- 877 7. A. K. Shalek, M. Benson, Single-cell analyses to tailor treatments., *Sci. Transl. Med.* **9**, eaan4730  
878 (2017).
- 879 8. M. J. T. Stubbington, O. Rozenblatt-Rosen, A. Regev, S. A. Teichmann, Single-cell transcriptomics

- 880 to explore the immune system in health and disease., *Science* **358**, 58–63 (2017).
- 881 9. M. G. Filbin, I. Tirosh, V. Hovestadt, M. L. Shaw, L. E. Escalante, N. D. Mathewson, C. Neftel, N.
- 882 Frank, K. Pelton, C. M. Hebert, C. Haberler, K. Yizhak, J. Gojo, K. Egervari, C. Mount, P. van Galen,
- 883 D. M. Bonal, Q.-D. Nguyen, A. Beck, C. Sinai, T. Czech, C. Dorfer, L. Goumnerova, C. Lavarino, A.
- 884 M. Carcaboso, J. Mora, R. Mylvaganam, C. C. Luo, A. Peyrl, M. Popović, A. Azizi, T. T. Batchelor,
- 885 M. P. Frosch, M. Martinez-Lage, M. W. Kieran, P. Bandopadhyay, R. Beroukhim, G. Fritsch, G.
- 886 Getz, O. Rozenblatt-Rosen, K. W. Wucherpfennig, D. N. Louis, M. Monje, I. Slavc, K. L. Ligon, T.
- 887 R. Golub, A. Regev, B. E. Bernstein, M. L. Suvà, Developmental and oncogenic programs in
- 888 H3K27M gliomas dissected by single-cell RNA-seq., *Science* **360**, 331–335 (2018).
- 889 10. H. Zhang, C. A. A. Lee, Z. Li, J. R. Garbe, C. R. Eide, R. Petegrosso, R. Kuang, J. Tolar, A.
- 890 Khan, Ed. A multitask clustering approach for single-cell RNA-seq analysis in Recessive Dystrophic
- 891 Epidermolysis Bullosa, *PLOS Comput. Biol.* **14**, e1006053 (2018).
- 892 11. E. Der, S. Ranabothu, H. Suryawanshi, K. M. Akat, R. Clancy, P. Morozov, M. Kustagi, M.
- 893 Czuppa, P. Izmirly, H. M. Belmont, T. Wang, N. Jordan, N. Bornkamp, J. Nwaukoni, J. Martinez, B.
- 894 Goilav, J. P. Buyon, T. Tuschl, C. Putterman, Single cell RNA sequencing to dissect the molecular
- 895 heterogeneity in lupus nephritis, *JCI Insight* **2** (2017), doi:10.1172/JCI.INSIGHT.93009.
- 896 12. K. D. Korthauer, L.-F. Chu, M. A. Newton, Y. Li, J. Thomson, R. Stewart, C. Kendziorski, A
- 897 statistical approach for identifying differential distributions in single-cell RNA-seq experiments,
- 898 *Genome Biol.* **17**, 222 (2016).
- 899 13. A. Compston, A. Coles, Multiple sclerosis, *Lancet* **372**, 1502–1517 (2008).
- 900 14. H.-C. Von Büdingen, T. C. Kuo, M. Sirota, C. J. Van Belle, L. Apeltsin, J. Glanville, B. A. Cree,
- 901 P. Gourraud, A. Schwartzburg, G. Huerta, D. Telman, P. D. Sundar, T. Casey, D. R. Cox, S. L.
- 902 Hauser, B cell exchange across the blood-brain barrier in multiple sclerosis, *J. Clin. Invest.* **122**, 24–
- 903 28 (2012).
- 904 15. S. L. Hauser, A. Bar-Or, G. Comi, G. Giovannoni, H.-P. Hartung, B. Hemmer, F. Lublin, X.
- 905 Montalban, K. W. Rammohan, K. Selmaj, A. Traboulsee, J. S. Wolinsky, D. L. Arnold, G.
- 906 Klingelschmitt, D. Masterman, P. Fontoura, S. Belachew, P. Chin, N. Mairon, H. Garren, L. Kappos,
- 907 Ocrelizumab versus Interferon Beta-1a in Relapsing Multiple Sclerosis, *N. Engl. J. Med.* **376**, 221–

- 908 234 (2017).
- 909 16. H. W. Kreth, R. Dunker, H. Rodt, R. Meyermann, Immunohistochemical identification of T-  
910 lymphocytes in the central nervous system of patients with multiple sclerosis and subacute sclerosing  
911 panencephalitis, *J. Neuroimmunol.* **2**, 177–183 (1982).
- 912 17. J. Machado-Santos, E. Saji, A. R. Tröscher, M. Paunovic, R. Liblau, G. Gabriely, C. G. Bien, J.  
913 Bauer, H. Lassmann, The compartmentalized inflammatory response in the multiple sclerosis brain is  
914 composed of tissue-resident CD8+ T lymphocytes and B cells, *Brain* , 2066–2082 (2018).
- 915 18. M. Rangachari, V. K. Kuchroo, Using EAE to better understand principles of immune function  
916 and autoimmune pathology, *J. Autoimmun.* **45**, 31–39 (2013).
- 917 19. B. Brynedal, M. Khademi, E. Wallström, J. Hillert, T. Olsson, K. Duvefelt, Gene expression  
918 profiling in multiple sclerosis: A disease of the central nervous system, but with relapses triggered in  
919 the periphery?, *Neurobiol. Dis.* **37**, 613–621 (2010).
- 920 20. J. J. Iliff, M. Wang, Y. Liao, B. A. Plogg, W. Peng, S. A. Goldman, E. A. Nagelhus, M.  
921 Nedergaard, A Paravascular Pathway Facilitates CSF Flow Through the Brain Parenchyma and the  
922 Clearance of Interstitial Solutes , Including Amyloid b, *Sci. Transl. Med.* **4**, 1–11 (2012).
- 923 21. C. Schläger, H. Körner, M. Krueger, S. Vidoli, M. Haberl, D. Mielke, E. Brylla, T. Issekutz, C.  
924 Cabanäs, P. J. Nelson, T. Ziemssen, V. Rohde, I. Bechmann, D. Lodygin, F. Odoardi, A. Flügel,  
925 Effector T-cell trafficking between the leptomeninges and the cerebrospinal fluid, *Nature* **530**, 349–  
926 353 (2016).
- 927 22. B. Engelhardt, R. O. Carare, I. Bechmann, A. Flügel, J. D. Laman, R. O. Weller, Vascular, glial,  
928 and lymphatic immune gateways of the central nervous system, *Acta Neuropathol.* **132**, 317–338  
929 (2016).
- 930 23. S. Han, Y. C. Lin, T. Wu, A. D. Salgado, I. Mexhitaj, S. C. Wuest, E. Romm, J. Ohayon, R.  
931 Goldbach-Mansky, A. Vanderver, A. Marques, C. Toro, P. Williamson, I. Cortese, B. Bielekova,  
932 Comprehensive Immunophenotyping of Cerebrospinal Fluid Cells in Patients with  
933 Neuroimmunological Diseases, *J. Immunol.* **192**, 2551–2563 (2014).
- 934 24. S. M. Brändle, B. Obermeier, M. Senel, J. Bruder, R. Mentele, M. Khademi, T. Olsson, H.  
935 Tumani, W. Kristoferitsch, F. Lottspeich, H. Wekerle, R. Hohlfeld, K. Dornmair, Distinct oligoclonal

- 936 band antibodies in multiple sclerosis recognize ubiquitous self-proteins, *Proc. Natl. Acad. Sci.* **113**,  
937 7864–7869 (2016).
- 938 25. S. Cepok, M. Jacobsen, S. Schock, B. Omer, S. Jaekel, I. Böddeker, W. H. Oertel, N. Sommer, B.  
939 Hemmer, Patterns of cerebrospinal fluid pathology correlate with disease progression in multiple  
940 sclerosis., *Brain* **124**, 2169–76 (2001).
- 941 26. M. C. Kowarik, V. Grummel, S. Wemlinger, D. Buck, M. S. Weber, A. Berthele, B. Hemmer,  
942 Immune cell subtyping in the cerebrospinal fluid of patients with neurological diseases, *J. Neurol.*  
943 **261**, 130–143 (2014).
- 944 27. A. Corcione, S. Casazza, E. Ferretti, D. Giunti, E. Zappia, A. Pistorio, C. Gambini, G. L.  
945 Mancardi, A. Uccelli, V. Pistoia, Recapitulation of B cell differentiation in the central nervous system  
946 of patients with multiple sclerosis., *Proc. Natl. Acad. Sci. U. S. A.* **101**, 11064–9 (2004).
- 947 28. J. Haas, I. Bekeredjian-Ding, M. Milkova, B. Balint, A. Schwarz, M. Korporal, S. Jarius, B. Fritz,  
948 H. M. Lorenz, B. Wildemann, B cells undergo unique compartmentalized redistribution in multiple  
949 sclerosis, *J. Autoimmun.* **37**, 289–299 (2011).
- 950 29. R. W. Steele, D. J. Marmer, M. D. O'Brien, S. T. Tyson, C. R. Steele, Leukocyte survival in  
951 cerebrospinal fluid., *J. Clin. Microbiol.* **23**, 965–6 (1986).
- 952 30. G. X. Y. Zheng, J. M. Terry, P. Belgrader, P. Ryvkin, Z. W. Bent, R. Wilson, S. B. Ziraldo, T. D.  
953 Wheeler, G. P. McDermott, J. Zhu, M. T. Gregory, J. Shuga, L. Montesclaros, J. G. Underwood, D.  
954 A. Masquelier, S. Y. Nishimura, M. Schnall-Levin, P. W. Wyatt, C. M. Hindson, R. Bharadwaj, A.  
955 Wong, K. D. Ness, L. W. Beppu, H. J. Deeg, C. McFarland, K. R. Loeb, W. J. Valente, N. G. Ericson,  
956 E. A. Stevens, J. P. Radich, T. S. Mikkelsen, B. J. Hindson, J. H. Bielas, Massively parallel digital  
957 transcriptional profiling of single cells, *Nat. Commun.* **8** (2017), doi:10.1038/ncomms14049.
- 958 31. D. E. Berezovsky, B. B. Bruce, C. Vasseneix, J. H. Peragallo, N. J. Newman, V. Biousse,  
959 Cerebrospinal fluid total protein in idiopathic intracranial hypertension, *J. Neurol. Sci.* **381**, 226–229  
960 (2017).
- 961 32. M. Wall, Idiopathic intracranial hypertension., *Neurol Clin.* **28**, 593–617 (2010).
- 962 33. A. Waschbisch, S. Schröder, D. Schraudner, L. Sammet, B. Weksler, A. Melms, S. Pfeifenbring,  
963 C. Stadelmann, S. Schwab, R. A. Linker, Pivotal Role for CD16+ Monocytes in Immune Surveillance



- 964 of the Central Nervous System., *J. Immunol.* **196**, 1558–67 (2016).
- 965 34. E. Rodríguez-Martín, C. Picón, L. Costa-Frossard, R. Alenda, S. Sainz de la Maza, E. Roldán, M.  
966 Espiño, L. M. Villar, J. C. Álvarez-Cermeño, Natural killer cell subsets in cerebrospinal fluid of  
967 patients with multiple sclerosis, *Clin. Exp. Immunol.* **180**, 243–249 (2015).
- 968 35. E. L. Eggers, B. a. Michel, H. Wu, S. Wang, C. J. Bevan, A. Abounasr, N. S. Pierson, A. Bischof,  
969 M. Kazer, E. Leitner, A. L. Greenfield, S. Demuth, M. R. Wilson, R. G. Henry, B. a. C. Cree, S. L.  
970 Hauser, H.-C. von Büdingen, Clonal relationships of CSF B cells in treatment-naive multiple sclerosis  
971 patients, *JCI Insight* **2** (2017), doi:10.1172/jci.insight.92724.
- 972 36. J. T. Gaublot, N. Yosef, Y. Lee, R. S. Gertner, L. V Yang, C. Wu, Single-Cell Genomics  
973 Unveils Critical Regulators of Th17 Cell Pathogenicity, (2015).
- 974 37. D. DeTomaso, N. Yosef, FastProject: a tool for low-dimensional analysis of single-cell RNA-Seq  
975 data, *BMC Bioinformatics* **17**, 315 (2016).
- 976 38. A. M. Newman, C. L. Liu, M. R. Green, A. J. Gentles, W. Feng, Y. Xu, C. D. Hoang, M. Diehn,  
977 A. A. Alizadeh, Robust enumeration of cell subsets from tissue expression profiles., *Nat. Methods* **12**,  
978 453–7 (2015).
- 979 39. S. Sawcer, G. Hellenthal, M. Pirinen, C. C. A. Spencer, N. A. Patsopoulos, L. Moutsianas, A.  
980 Dilthey, Z. Su, C. Freeman, S. E. Hunt, S. Edkins, E. Gray, D. R. Booth, S. C. Potter, A. Goris, G.  
981 Band, A. Bang Oturai, A. Strange, J. Saarela, C. Bellenguez, B. Fontaine, M. Gillman, B. Hemmer, R.  
982 Gwilliam, F. Zipp, A. Jayakumar, R. Martin, S. Leslie, S. Hawkins, E. Giannoulatou, S. D’alfonso, H.  
983 Blackburn, F. Martinelli Boneschi, J. Liddle, H. F. Harbo, M. L. Perez, A. Spurkland, M. J. Waller,  
984 M. P. Mycko, M. Ricketts, M. Comabella, N. Hammond, I. Kockum, O. T. McCann, M. Ban, P.  
985 Whittaker, A. Kempainen, P. Weston, C. Hawkins, S. Widaa, J. Zajicek, S. Dronov, N. Robertson, S.  
986 J. Bumpstead, L. F. Barcellos, R. Ravindrarajah, R. Abraham, L. Alfredsson, K. Ardlie, C. Aubin, A.  
987 Baker, K. Baker, S. E. Baranzini, L. Bergamaschi, R. Bergamaschi, A. Bernstein, A. Berthele, M.  
988 Boggild, J. P. Bradfield, D. Brassat, S. A. Broadley, D. Buck, H. Butzkueven, R. Capra, W. M.  
989 Carroll, P. Cavalla, E. G. Celius, S. Cepok, R. Chiavacci, F. Clerget-Darpoux, K. Clysters, G. Comi,  
990 M. Cossburn, I. Cournu-Rebeix, M. B. Cox, W. Cozen, B. A. C. Cree, A. H. Cross, D. Cusi, M. J.  
991 Daly, E. Davis, P. I. W. de Bakker, M. Debouverie, M. B. D’hooghe, K. Dixon, R. Dobosi, B. Dubois,

- 992 D. Ellinghaus, I. Elovaara, F. Esposito, C. Fontenille, S. Foote, A. Franke, D. Galimberti, A. Ghezzi,  
993 J. Glessner, R. Gomez, O. Gout, C. Graham, S. F. A. Grant, F. Rosa Guerini, H. Hakonarson, P. Hall,  
994 A. Hamsten, H.-P. Hartung, R. N. Heard, S. Heath, J. Hobart, M. Hoshi, C. Infante-Duarte, G.  
995 Ingram, W. Ingram, T. Islam, M. Jagodic, M. Kabesch, A. G. Kermode, T. J. Kilpatrick, C. Kim, N.  
996 Klopp, K. Koivisto, M. Larsson, M. Lathrop, J. S. Lechner-Scott, M. A. Leone, V. Leppä, U.  
997 Liljedahl, I. Lima Bomfim, R. R. Lincoln, J. Link, J. Liu, Å. R. Lorentzen, S. Lupoli, F. Macciardi, T.  
998 Mack, M. Marriott, V. Martinelli, D. Mason, J. L. McCauley, F. Mentch, I.-L. Mero, T. Mihalova, X.  
999 Montalban, J. Mottershead, K.-M. Myhr, P. Naldi, W. Ollier, A. Page, A. Palotie, J. Pelletier, L.  
1000 Piccio, T. Pickersgill, F. Piehl, S. Pobywajlo, H. L. Quach, P. P. Ramsay, M. Reunanen, R. Reynolds,  
1001 J. D. Rioux, M. Rodegher, S. Roesner, J. P. Rubio, I.-M. Rückert, M. Salvetti, E. Salvi, A.  
1002 Santaniello, C. A. Schaefer, S. Schreiber, C. Schulze, R. J. Scott, F. Sellebjerg, K. W. Selmaj, D.  
1003 Sexton, L. Shen, B. Simms-Acuna, S. Skidmore, P. M. A. Sleiman, C. Smestad, P. S. Sørensen, H. B.  
1004 Søndergaard, J. Stankovich, R. C. Strange, A.-M. Sulonen, E. Sundqvist, A.-C. Syvänen, F. Taddeo,  
1005 B. Taylor, J. M. Blackwell, P. Tienari, E. Bramon, A. Tourbah, M. A. Brown, E. Tronczynska, J. P.  
1006 Casas, N. Tubridy, A. Corvin, J. Vickery, J. Jankowski, P. Villoslada, H. S. Markus, K. Wang, C. G.  
1007 Mathew, J. Wason, C. N. A. Palmer, H.-E. Wichmann, R. Plomin, E. Willoughby, A. Rautanen, J.  
1008 Winkelmann, M. Wittig, R. C. Trembath, J. Yaouanq, A. C. Viswanathan, H. Zhang, N. W. Wood, R.  
1009 Zuvich, P. Deloukas, C. Langford, A. Duncanson, J. R. Oksenberg, M. A. Pericak-Vance, J. L.  
1010 Haines, T. Olsson, J. Hillert, A. J. Ivinson, P. L. De Jager, L. Peltonen, G. J. Stewart, D. A. Hafler, S.  
1011 L. Hauser, G. McVean, P. Donnelly, A. Compston, Genetic risk and a primary role for cell-mediated  
1012 immune mechanisms in multiple sclerosis, *Nature* **476**, 214–219 (2011).  
1013 40. P. L. De Jager, I. M. S. G. Consortium, The Multiple Sclerosis Genomic Map: Role of peripheral  
1014 immune cells and resident microglia in susceptibility, , 1–43 (2017).  
1015 41. a. Subramanian, P. Tamayo, V. K. Mootha, S. Mukherjee, B. L. Ebert, M. a. Gillette, a.  
1016 Paulovich, S. L. Pomeroy, T. R. Golub, E. S. Lander, J. P. Mesirov, Gene set enrichment analysis: A  
1017 knowledge-based approach for interpreting genome-wide expression profiles, *Proc. Natl. Acad. Sci.*  
1018 **102**, 15545–15550 (2005).  
1019 42. A. Liberzon, A. Subramanian, R. Pinchback, H. Thorvaldsdóttir, P. Tamayo, J. P. Mesirov,

- 1020 Molecular signatures database (MSigDB) 3.0., *Bioinformatics* **27**, 1739–40 (2011).
- 1021 43. K. Kandasamy, S. Mohan, R. Raju, S. Keerthikumar, G. S. S. Kumar, A. K. Venugopal, D.
- 1022 Telikicherla, D. J. Navarro, S. Mathivanan, C. Pecquet, S. K. Gollapudi, S. G. Tattikota, S. Mohan, H.
- 1023 Padhukasahasram, Y. Subbannayya, R. Goel, H. K. C. Jacob, J. Zhong, R. Sekhar, V. Nanjappa, L.
- 1024 Balakrishnan, R. Subbaiah, Y. I Ramachandra, A. Rahiman, T. s Keshava Prasad, J.-X. Lin, J. C. D.
- 1025 Houtman, S. Desiderio, J.-C. Renauld, S. Constantinescu, O. Ohara, T. Hirano, M. Kubo, S. Singh, P.
- 1026 Khatri, S. Draghici, G. D. Bader, C. Sander, W. J. Leonard, A. Pandey, NetPath: a public resource of
- 1027 curated signal transduction pathways, *Genome Biol.* **11**, R3 (2010).
- 1028 44. A. Crawford, J. M. Angelosanto, C. Kao, T. A. Doering, P. M. Odorizzi, B. E. Barnett, E. J.
- 1029 Wherry, Molecular and transcriptional basis of CD4<sup>+</sup> T cell dysfunction during chronic infection.,
- 1030 *Immunity* **40**, 289–302 (2014).
- 1031 45. T. C. Wirth, H.-H. Xue, D. Rai, J. T. Sabel, T. Bair, J. T. Harty, V. P. Badovinac, Repetitive
- 1032 antigen stimulation induces stepwise transcriptome diversification but preserves a core signature of
- 1033 memory CD8(+) T cell differentiation., *Immunity* **33**, 128–40 (2010).
- 1034 46. T. Lönnberg, V. Svensson, K. R. James, D. Fernandez-Ruiz, I. Sebina, R. Montandon, M. S. F.
- 1035 Soon, L. G. Fogg, A. S. Nair, U. N. Liligeto, M. J. T. Stubbington, L.-H. Ly, F. O. Bagger, M.
- 1036 Zwiessele, N. D. Lawrence, F. Souza-Fonseca-Guimaraes, P. T. Bunn, C. R. Engwerda, W. R. Heath,
- 1037 O. Billker, O. Stegle, A. Haque, S. A. Teichmann, Single-cell RNA-seq and computational analysis
- 1038 using temporal mixture modeling resolves T<sub>H</sub> 1/T<sub>FH</sub> fate bifurcation in malaria, *Sci. Immunol.* **2**,
- 1039 eaal2192 (2017).
- 1040 47. S. Xiao, N. Yosef, J. Yang, Y. Wang, L. Zhou, C. Zhu, C. Wu, E. Baloglu, D. Schmidt, R.
- 1041 Ramesh, M. Lobera, M. S. Sundrud, P.-Y. Tsai, Z. Xiang, J. Wang, Y. Xu, X. Lin, K. Kretschmer, P.
- 1042 B. Rahl, R. A. Young, Z. Zhong, D. A. Hafler, A. Regev, S. Ghosh, A. Marson, V. K. Kuchroo,
- 1043 Small-molecule ROR $\gamma$ t antagonists inhibit T helper 17 cell transcriptional network by divergent
- 1044 mechanisms., *Immunity* **40**, 477–89 (2014).
- 1045 48. X. Liu, X. Chen, B. Zhong, A. Wang, X. Wang, F. Chu, R. I. Nurieva, X. Yan, P. Chen, L. G. van
- 1046 der Flier, H. Nakatsukasa, S. S. Neelapu, W. Chen, H. Clevers, Q. Tian, H. Qi, L. Wei, C. Dong,
- 1047 Transcription factor achaete-scute homologue 2 initiates follicular T-helper-cell development, *Nature*

- 1048 **507**, 513–518 (2014).
- 1049 49. S. Crotty, Follicular Helper CD4 T Cells (T<sub>FH</sub>), *Annu. Rev. Immunol.* **29**, 621–663 (2011).
- 1050 50. R. I. Nurieva, Y. Chung, G. J. Martinez, X. O. Yang, S. Tanaka, T. D. Matskevitch, Y. Wang, C.  
1051 Dong, Bcl6 mediates the development of T follicular helper cells, *Science (80-. )*. **325**, 1001–1005  
1052 (2010).
- 1053 51. X. Fan, T. Jin, S. Zhao, C. Liu, J. Han, X. Jiang, Y. Jiang, Circulating CCR7+ICOS+ memory T  
1054 follicular helper cells in patients with multiple sclerosis, *PLoS One* **10**, 1–14 (2015).
- 1055 52. J. R. Christensen, L. Börnsen, R. Ratzner, F. Piehl, M. Khademi, T. Olsson, P. S. Sørensen, F.  
1056 Sellebjerg, Systemic Inflammation in Progressive Multiple Sclerosis Involves Follicular T-Helper,  
1057 Th17- and Activated B-Cells and Correlates with Progression, *PLoS One* **8**, 1–11 (2013).
- 1058 53. D. a. Rao, M. F. Gurish, J. L. Marshall, K. Slowikowski, C. Y. Fonseka, Y. Liu, L. T. Donlin, L.  
1059 a. Henderson, K. Wei, F. Mizoguchi, N. C. Teslovich, M. E. Weinblatt, E. M. Massarotti, J. S.  
1060 Coblyn, S. M. Helfgott, Y. C. Lee, D. J. Todd, V. P. Bykerk, S. M. Goodman, A. B. Pernis, L. B.  
1061 Ivashkiv, E. W. Karlson, P. a. Nigrovic, A. Filer, C. D. Buckley, J. a. Lederer, S. Raychaudhuri, M. B.  
1062 Brenner, Pathologically expanded peripheral T helper cell subset drives B cells in rheumatoid  
1063 arthritis, *Nature* **542**, 110–114 (2017).
- 1064 54. K. Hollister, S. Kusam, H. Wu, N. Clegg, a. Mondal, D. V. Sawant, a. L. Dent, Insights into the  
1065 Role of Bcl6 in Follicular Th Cells Using a New Conditional Mutant Mouse Model, *J. Immunol.* **191**,  
1066 3705–3711 (2013).
- 1067 55. Y. Enose-Akahata, S. Azodi, B. R. Smith, B. J. Billioux, A. Vellucci, N. Ngouth, Y. Tanaka, J.  
1068 Ohayon, I. Cortese, A. Nath, S. Jacobson, C. R. M. Bangham, Ed. Immunophenotypic  
1069 characterization of CSF B cells in virus-associated neuroinflammatory diseases, *PLOS Pathog.* **14**,  
1070 e1007042 (2018).
- 1071 56. J. Guo, C. Zhao, F. Wu, L. Tao, C. Zhang, D. Zhao, S. Yang, D. Jiang, J. Wang, Y. Sun, Z. Li, H.  
1072 Li, K. Yang, T Follicular Helper-Like Cells Are Involved in the Pathogenesis of Experimental  
1073 Autoimmune Encephalomyelitis, *Front. Immunol.* **9**, 944 (2018).
- 1074 57. A. Lossius, A. Tomescu-Baciu, T. Holmøy, C. A. Vedeler, E. Røsjø, Å. R. Lorentzen, I. Casetta,  
1075 F. Vartdal, Selective intrathecal enrichment of G1m1-positive B cells in multiple sclerosis., *Ann. Clin.*

- 1076 *Transl. Neurol.* **4**, 756–761 (2017).
- 1077 58. S. Cepok, B. Rosche, V. Grummel, F. Vogel, D. Zhou, J. Sayn, N. Sommer, H.-P. Hartung, B.  
1078 Hemmer, Short-lived plasma blasts are the main B cell effector subset during the course of multiple  
1079 sclerosis, *Brain* **128**, 1667–1676 (2005).
- 1080 59. C. M. Lill, B. M. M. Schjeide, C. Graetz, M. Ban, A. Alcina, M. a. Ortiz, J. Pérez, V. Damotte, D.  
1081 Booth, A. Lopez De Lapuente, L. Broer, M. Schilling, D. a. Akkad, O. Aktas, I. Alloza, A.  
1082 Antigüedad, R. Arroyo, P. Blaschke, M. Buttman, A. Chan, A. Compston, I. Cournu-Rebeix, T.  
1083 Dörner, J. T. Epplen, Ó. Fernández, L. A. Gerdes, L. Guillot-Noël, H. P. Hartung, S. Hoffjan, G.  
1084 Izquierdo, A. Kemppinen, A. Kroner, C. Kubisch, T. Kümpfel, S. C. Li, U. Lindenberger, P. Lohse,  
1085 C. Lubetzki, F. Luessi, S. Malhotra, J. Mescheriakova, X. Montalban, C. Papeix, L. F. Paredes, P.  
1086 Rieckmann, E. Steinhagen-Thiessen, A. Winkelmann, U. K. Zettl, R. Hintzen, K. Vandebroeck, G.  
1087 Stewart, B. Fontaine, M. Comabella, E. Urcelay, F. Matesanz, S. Sawcer, L. Bertram, F. Zipp,  
1088 MANBA, CXCR5, SOX8, RPS6KB1 and ZBTB46 are genetic risk loci for multiple sclerosis, *Brain*  
1089 **136**, 1778–1782 (2013).
- 1090 60. F. Humby, M. Bombardieri, A. Manzo, S. Kelly, M. C. Blades, B. Kirkham, J. Spencer, C.  
1091 Pitzalis, Ectopic lymphoid structures support ongoing production of class-switched autoantibodies in  
1092 rheumatoid synovium., *PLoS Med.* **6**, e1 (2009).
- 1093 61. R. Magliozzi, O. Howell, A. Vora, B. Serafini, R. Nicholas, M. Puopolo, R. Reynolds, F. Aloisi,  
1094 Meningeal B-cell follicles in secondary progressive multiple sclerosis associate with early onset of  
1095 disease and severe cortical pathology, *Brain* **130**, 1089–1104 (2006).
- 1096 62. B. Serafini, B. Rosicarelli, R. Magliozzi, E. Stigliano, F. Aloisi, Detection of Ectopic B-cell  
1097 Follicles with Germinal Centers in the Meninges of Patients with Secondary Progressive Multiple  
1098 Sclerosis, *Brain Pathol.* **14**, 164–174 (2004).
- 1099 63. S. R. Slight, J. Rangel-Moreno, R. Gopal, Y. Lin, B. A. Fallert Junecko, S. Mehra, M. Selman, E.  
1100 Becerril-Villanueva, J. Baquera-Heredia, L. Pavon, D. Kaushal, T. A. Reinhart, T. D. Randall, S. A.  
1101 Khader, CXCR5<sup>+</sup> T helper cells mediate protective immunity against tuberculosis., *J. Clin. Invest.*  
1102 **123**, 712–26 (2013).
- 1103 64. G. Androdias, R. Reynolds, M. Chanal, C. Ritleng, C. Confavreux, S. Nataf, Meningeal T cells

- 1104 associate with diffuse axonal loss in multiple sclerosis spinal cords, *Ann. Neurol.* **68**, 465–476 (2010).
- 1105 65. S. R. Choi, O. W. Howell, D. Carassiti, R. Magliozzi, D. Gveric, P. A. Muraro, R. Nicholas, F.
- 1106 Roncaroli, R. Reynolds, Meningeal inflammation plays a role in the pathology of primary progressive
- 1107 multiple sclerosis, *Brain* **135**, 2925–2937 (2012).
- 1108 66. R. Magliozzi, O. W. Howell, C. Reeves, F. Roncaroli, R. Nicholas, B. Serafini, F. Aloisi, R.
- 1109 Reynolds, A Gradient of neuronal loss and meningeal inflammation in multiple sclerosis, *Ann.*
- 1110 *Neurol.* **68**, 477–493 (2010).
- 1111 67. C. Teunissen, T. Menge, A. Altintas, J. C. Álvarez-Cermeño, A. Bertolotto, F. S. Berven, L.
- 1112 Brundin, M. Comabella, M. Degen, F. Deisenhammer, F. Fazekas, D. Franciotta, J. L. Frederiksen, D.
- 1113 Galimberti, S. Gnanapavan, H. Hegen, B. Hemmer, R. Hintzen, S. Hughes, E. Iacobaeus, A. C.
- 1114 Kroksveen, J. Kuhle, J. Richert, H. Tumani, L. M. Villar, J. Drulovic, I. Dujmovic, M. Khalil, A.
- 1115 Bartos, Consensus definitions and application guidelines for control groups in cerebrospinal fluid
- 1116 biomarker studies in multiple sclerosis, *Mult. Scler. J.* **19**, 1802–1809 (2013).
- 1117 68. G. M. Swanson, J. C. Bailar, Selection and description of cancer clinical trials
- 1118 participants? Science or happenstance?, *Cancer* **95**, 950–959 (2002).
- 1119 69. D. L. Vargas, W. R. Tyor, Update on disease-modifying therapies for multiple sclerosis., *J.*
- 1120 *Investig. Med.* **65**, 883–891 (2017).
- 1121 70. M. K. Singh, T. F. Scott, W. A. LaFramboise, F. Z. Hu, J. C. Post, G. D. Ehrlich, Gene expression
- 1122 changes in peripheral blood mononuclear cells from multiple sclerosis patients undergoing  $\beta$ -
- 1123 interferon therapy, *J. Neurol. Sci.* **258**, 52–59 (2007).
- 1124 71. A. Achiron, M. Gurevich, N. Friedman, N. Kaminski, M. Mandel, Blood transcriptional signatures
- 1125 of multiple sclerosis: Unique gene expression of disease activity, *Ann. Neurol.* **55**, 410–417 (2004).
- 1126 72. J. Satoh, M. Nakanishi, F. Koike, H. Onoue, T. Aranami, T. Yamamoto, M. Kawai, S. Kikuchi, K.
- 1127 Nomura, K. Yokoyama, K. Ota, T. Saito, M. Ohta, S. Miyake, T. Kanda, T. Fukazawa, T. Yamamura,
- 1128 T cell gene expression profiling identifies distinct subgroups of Japanese multiple sclerosis patients.,
- 1129 *J. Neuroimmunol.* **174**, 108–18 (2006).
- 1130 73. R. Menon, M. Di Dario, C. Cordiglieri, S. Musio, L. La Mantia, C. Milanese, A. L. Di Stefano, M.
- 1131 Crabbio, D. Franciotta, R. Bergamaschi, R. Pedotti, E. Medico, C. Farina, Gender-based blood

- 1132 transcriptomes and interactomes in multiple sclerosis: Involvement of SP1 dependent gene  
1133 transcription, *J. Autoimmun.* **38**, J144–J155 (2012).
- 1134 74. K. S. Gandhi, F. C. McKay, M. Cox, C. Riveros, N. Armstrong, R. N. Heard, S. Vucic, D. W.  
1135 Williams, J. Stankovich, M. Brown, P. Danoy, G. J. Stewart, S. Broadley, P. Moscato, J. Lechner-  
1136 Scott, R. J. Scott, D. R. Booth, L. Griffiths, M. Slee, S. Browning, B. L. Browning, T. Kilpatrick, J.  
1137 Rubio, V. Perreau, H. Butzkeuven, M. Tanner, J. Wiley, S. Foote, J. Stankovich, B. Taylor, A.  
1138 Kermode, B. Carroll, M. Bahlo, The multiple sclerosis whole blood mRNA transcriptome and genetic  
1139 associations indicate dysregulation of specific T cell pathways in pathogenesis, *Hum. Mol. Genet.* **19**,  
1140 2134–2143 (2010).
- 1141 75. L. Ottoboni, B. T. Keenan, P. Tamayo, M. Kuchroo, J. P. Mesirov, G. J. Buckle, S. J. Khoury, D.  
1142 A. Hafler, H. L. Weiner, P. L. De Jager, An RNA profile identifies two subsets of multiple sclerosis  
1143 patients differing in disease activity., *Sci. Transl. Med.* **4**, 153ra131 (2012).
- 1144 76. S. Srinivasan, M. Di Dario, A. Russo, R. Menon, E. Brini, M. Romeo, F. Sangalli, G. D. Costa, M.  
1145 Rodegher, M. Radaelli, L. Moiola, D. Cantarella, E. Medico, G. Martino, R. Furlan, V. Martinelli, G.  
1146 Comi, C. Farina, Dysregulation of MS risk genes and pathways at distinct stages of disease., *Neurol.*  
1147 *Neuroimmunol. neuroinflammation* **4**, e337 (2017).
- 1148 77. D. Nickles, H. P. Chen, M. M. Li, P. Khankhanian, L. Madireddy, S. J. Caillier, A. Santaniello, B.  
1149 A. C. Cree, D. Pelletier, S. L. Hauser, J. R. Oksenberg, S. E. Baranzini, Blood RNA profiling in a  
1150 large cohort of multiple sclerosis patients and healthy controls, *Hum. Mol. Genet.* **22**, 4194–4205  
1151 (2013).
- 1152 78. Y. Cao, B. A. Goods, K. Raddassi, G. T. Nepom, W. W. Kwok, J. C. Love, D. A. Hafler,  
1153 Functional inflammatory profiles distinguish myelin-reactive T cells from patients with multiple  
1154 sclerosis., *Sci. Transl. Med.* **7**, 287ra74 (2015).
- 1155 79. M. Filippi, M. A. Rocca, O. Ciccarelli, N. De Stefano, N. Evangelou, L. Kappos, A. Rovira, J.  
1156 Sastre-Garriga, M. Tintorè, J. L. Frederiksen, C. Gasperini, J. Palace, D. S. Reich, B. Banwell, X.  
1157 Montalban, F. Barkhof, MRI criteria for the diagnosis of multiple sclerosis: MAGNIMS consensus  
1158 guidelines, *Lancet Neurol.* **15**, 292–303 (2016).
- 1159 80. X. Montalban, M. Tintoré, J. Swanton, F. Barkhof, F. Fazekas, M. Filippi, J. Frederiksen, L.



- 1160 Kappos, J. Palace, C. Polman, M. Rovaris, N. de Stefano, A. Thompson, T. Yousry, A. Rovira, D. H.  
1161 Miller, MRI criteria for MS in patients with clinically isolated syndromes., *Neurology* **74**, 427–34  
1162 (2010).
- 1163 81. M. B. Cole, D. Risso, A. Wagner, D. DeTomaso, J. Ngai, E. Purdom, S. Dudoit, N. Yosef,  
1164 Performance Assessment and Selection of Normalization Procedures for Single-Cell RNA-Seq,  
1165 *bioRxiv* , 235382 (2017).
- 1166 82. E. Eisenberg, E. Y. Levanon, Human housekeeping genes are compact, *Trends Genet.* **19**, 362–  
1167 365 (2003).
- 1168 83. D. Risso, J. Ngai, T. P. Speed, S. Dudoit, Normalization of RNA-seq data using factor analysis of  
1169 control genes or samples, *Nat. Biotechnol.* **32**, 896–902 (2014).
- 1170 84. R. Satija, J. A. Farrell, D. Gennert, A. F. Schier, A. Regev, Spatial reconstruction of single-cell  
1171 gene expression data, *Nat. Biotechnol.* **33**, 495–502 (2015).
- 1172 85. C. W. Law, Y. Chen, W. Shi, G. K. Smyth, voom: precision weights unlock linear model analysis  
1173 tools for RNA-seq read counts, *Genome Biol.* **15**, R29 (2014).
- 1174 86. Q. Li, J. B. Brown, H. Huang, P. J. Bickel, Measuring reproducibility of high-throughput  
1175 experiments, *Ann. Appl. Stat.* (2011), doi:10.1214/11-AOAS466.
- 1176 87. E. Martin-Gayo, M. B. Cole, K. E. Kolb, Z. Ouyang, J. Cronin, S. W. Kazer, J. Ordovas-  
1177 Montanes, M. Lichterfeld, B. D. Walker, N. Yosef, A. K. Shalek, X. G. Yu, A Reproducibility-Based  
1178 Computational Framework Identifies an Inducible, Enhanced Antiviral State in Dendritic Cells from  
1179 HIV-1 Elite Controllers., *Genome Biol.* **19**, 10 (2018).
- 1180 88. S. Picelli, O. R. Faridani, Å. K. Björklund, G. Winberg, S. Sagasser, R. Sandberg, Full-length  
1181 RNA-seq from single cells using Smart-seq2, *Nat. Protoc.* **9**, 171–181 (2014).
- 1182 89. B. Langmead, C. Trapnell, M. Pop, S. L. Salzberg, Ultrafast and memory-efficient alignment of  
1183 short DNA sequences to the human genome, *Genome Biol.* **10**, R25 (2009).
- 1184 90. B. Li, C. N. Dewey, RSEM: accurate transcript quantification from RNA-Seq data with or without  
1185 a reference genome, *BMC Bioinformatics* **12**, 323 (2011).
- 1186 91. P. P. Lee, D. R. Fitzpatrick, C. Beard, H. K. Jessup, S. Lehar, K. W. Makar, M. Pérez-Melgosa,  
1187 M. T. Sweetser, M. S. Schlissel, S. Nguyen, S. R. Cherry, J. H. Tsai, S. M. Tucker, W. M. Weaver, A.

1188 Kelso, R. Jaenisch, C. B. Wilson, A Critical Role for Dnmt1 and DNA Methylation in T Cell  
1189 Development, Function, and Survival, *Immunity* **15**, 763–774 (2001).

1190

1191 **Acknowledgements**

1192 We thank Claudia Kemming, Anna-Lena Börsch, Maik Höfer, Gabriele Berens, and Kirsten Weiss for  
1193 technical assistance.

1194

1195 **Funding**

1196 G.M.z.H. was supported in part by grants from the Deutsche Forschungsgemeinschaft (DFG, grant  
1197 number ME4050/4-1), from the Gemeinnützige Hertie Stiftung, from the Innovative Medical Research  
1198 (IMF) program of the Westfälische Wilhelms-University Münster, and from the Ministerium für  
1199 Innovation, Wissenschaft und Forschung (MIWF) des Landes Nordrhein-Westfalen. This project was  
1200 funded in part by the Sonderforschungsbereich Transregio 128 of the DFG (to S.G.M., A09 to H.W. and  
1201 C.C.G., Z02 to H.W. and T.K.).

1202

1203 **Author contributions**

1204 D.S., M.H., T.L., J.W. performed experiments, M.C., K.B., N.Y. performed computational analyses,  
1205 M.S., C.K. recruited patients and performed lumbar punctures, C.G. processed CSF samples, T.K.  
1206 performed histology, S.G.M., H.W. co-supervised the study, N.Y., G.M.z.H. conceived and supervised  
1207 the study and wrote the manuscript. All authors critically revised the manuscript.

1208

1209 **Competing Interests**

1210 The authors declare no competing interests.

1211

1212

1213 **Figures**

**Figure 1**

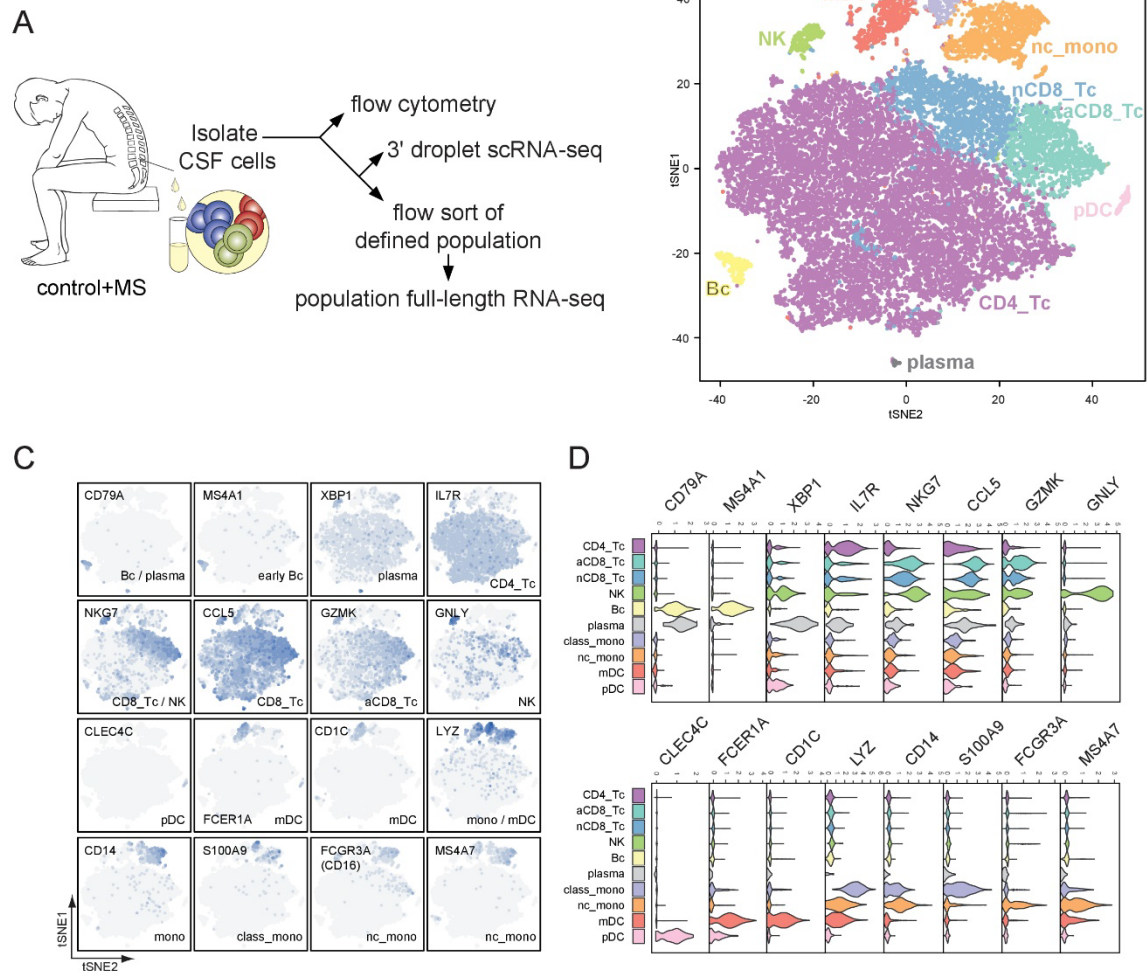

1214

1215 *Fig. 1. Single-cell transcriptomics reconstructs the CSF leukocyte composition.*

1216 (A) Schematic of the study sampling and processing. CSF cells of all control (n = 22) and multiple  
 1217 sclerosis (MS) (n = 26) donors were analysed by flow cytometry. Subsequently, scRNA-seq of unsorted  
 1218 CSF cells (cohort 1, n = 6 donors each group) and bulk RNA-seq of sorted T follicular helper (TFH)  
 1219 cells (cohort 3, n = 9 donors each group) were performed on randomly selected donor samples. Cohort  
 1220 2 was only used for flow cytometry and not processed for sequencing (B) t-distributed stochastic  
 1221 neighbour embedding (t-SNE) plot of 10 color-coded cell clusters identified by scRNA-seq after quality  
 1222 control filtering and normalization (Methods) in 22,357 total merged control- (n = 4) and MS-derived  
 1223 (n = 4) CSF cells. Cluster identity was manually assigned based on marker gene expression: (C) Feature  
 1224 plots, representing all 22,357 donor cells as in panel B, showing expression of selected marker genes,

1225 differentially-expressed in one vs. all comparisons (Methods). Dark blue colours indicate high log-  
 1226 expression while light grey indicates non-expression. Selected protein names are provided for clarity,  
 1227 with expressing cell types indicated. (D) Stacked violin plots of the same marker genes in specified cell  
 1228 clusters. Cluster key: *CD4\_Tc* CD4<sup>+</sup> T cells, *aCD8\_Tc* / *nCD8\_Tc* activated / naïve CD8<sup>+</sup> T cells, *NK*  
 1229 natural killer cells, *Bc* B cells, *plasma* plasma cells, *class\_mono* / *nc\_mono* classical / non-classical  
 1230 monocytes, *mDC* / *pDC* myeloid / plasmacytoid dendritic cells.  
 1231

Figure 2

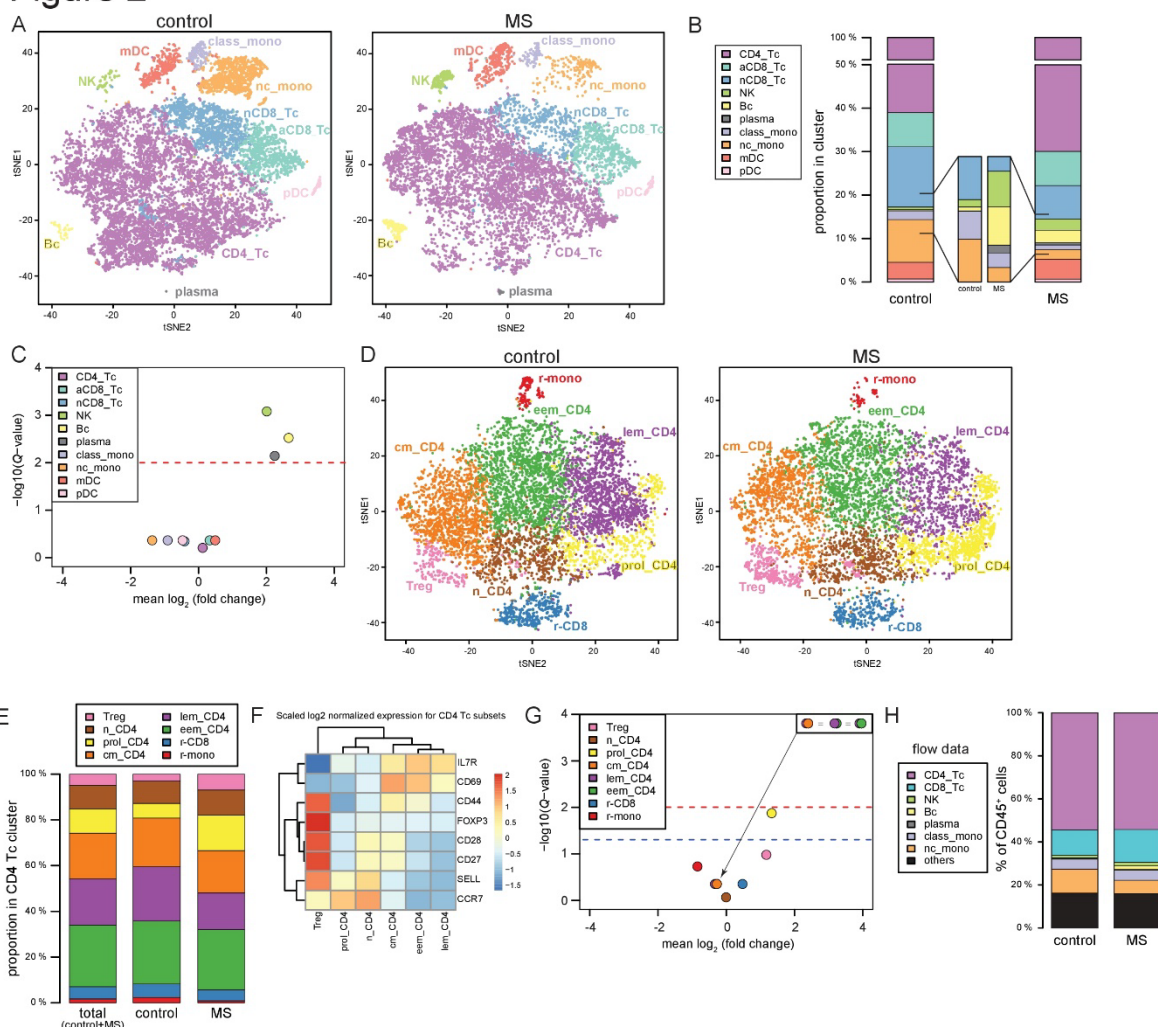

1232

1233 *Fig. 2. Unbiased transcriptomics detects NK and B lineage CSF cell expansion in MS.*

1234 (A) Condition-specific selections of the t-SNE plot in Figure 1, panel B. The distribution of cell types  
 1235 identified by scRNA-seq in control- (n = 4 donors, 12,705 cells, left plot) and MS-derived (n = 4 donors,  
 1236 9,652 cells, right plot) CSF cells. (B) Barplots depicting the average proportion of cells in each cluster

1237 in control and MS samples (note split y-axis). Insets highlight abundance of rarer cell types. (C) Volcano  
1238 plot representing the results of statistical testing for differential cluster abundance between MS vs.  
1239 control donors.  $\log_{10}$ -transformed moderated  $t$ -test  $Q$ -values (Benjamini-Hochberg) from linear effect  
1240 modelling on  $\log_2$ -abundance are plotted against estimated mean  $\log_2$  fold change. Horizontal line  
1241 indicates significance threshold, controlling the FDR  $< 0.01$ . (D) Cell profiles from the CD4<sup>+</sup> T-cell  
1242 (*CD4\_Tc*) cluster depicted in Figure 1B were re-normalized together and subclustered. A new t-SNE  
1243 computed for all CD4\_Tc cells was subselected to plot 8 subclusters identified across control- (n = 4  
1244 donors, 7,764 cells, left plot) and MS-derived (n = 4 donors, 6,749 cells, right plot) CSF samples. (E)  
1245 Average proportion of cells in each CD4\_Tc subcluster (including remainder (*r*-)CD8 and monocytes  
1246 (*r-mono*)). (F) Heatmap representing the mean normalized  $\log_2$  UMI counts for marker genes (rows) in  
1247 CD4\_Tc subclusters (column) of the dataset depicted in panel D. Rows are Z-normalized so that all  
1248 marker genes are represented using a common scale. Rows and columns are hierarchically clustered.  
1249 (G) Volcano plot as in panel C of CD4\_Tc subcluster abundance differences between MS vs. control  
1250 donors. Horizontal lines indicate significance thresholds (blue  $Q < 0.05$ , red  $Q < 0.01$ ) and inset  
1251 highlights overlapping symbols representing memory cell types. (H) Barplots representing the  
1252 proportion of CSF leukocyte subsets identified by flow cytometry in control vs. MS. Cluster key:  
1253 *CD4\_Tc* CD4<sup>+</sup> T cells, *aCD8\_Tc* / *nCD8\_Tc* activated / naïve CD8<sup>+</sup> T cells, *NK* natural killer cells, *Bc*  
1254 B cells, *plasma* plasma cells, *class\_mono* / *nc\_mono* classical / non-classical monocytes, *mDC* / *pDC*  
1255 myeloid / plasmacytoid dendritic cells, *Treg* regulatory T helper cells, *n\_CD4* naïve, *prol\_CD4*  
1256 proliferating, *cm\_CD4* central memory, *lem\_CD4* late effector memory, and *eem\_CD4* early effector  
1257 memory CD4<sup>+</sup> T cells, *r-CD8* remaining CD8<sup>+</sup> T cells, *r-mono* remaining monocytes.  
1258



## Figure 3

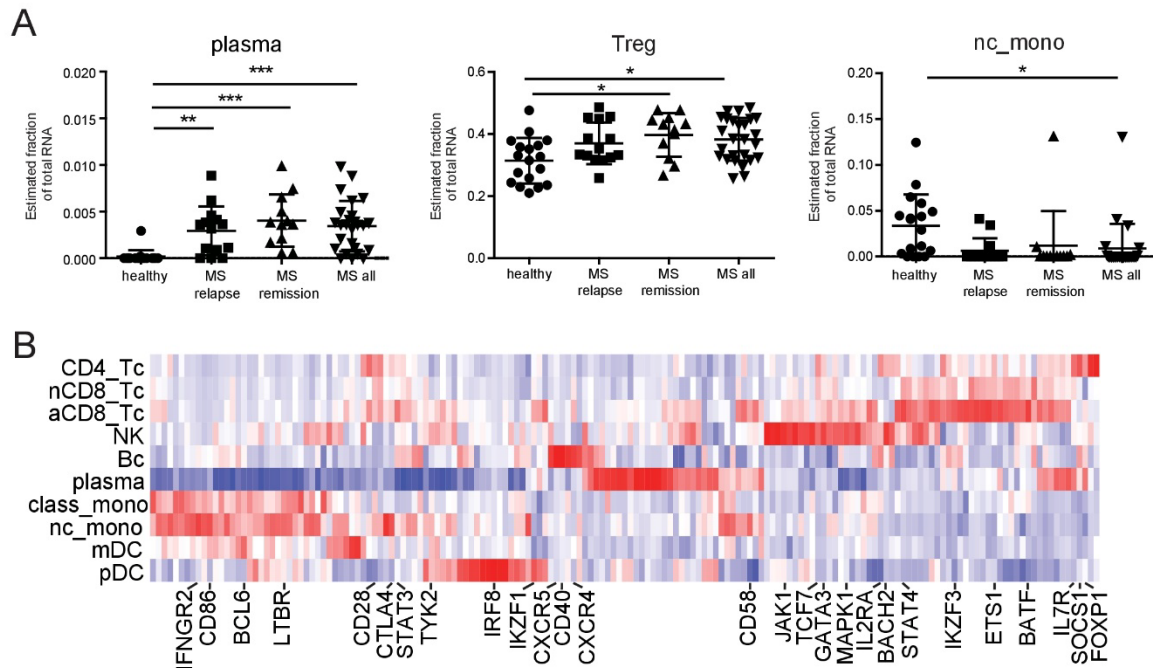

1259

1260 *Fig. 3. Deconvolution and interpretation of CSF cell transcriptomes and MS genetics.*

1261 (A) Published microarray data of unsorted CSF cells from controls and MS patients in relapse or  
 1262 remission (19) were retrieved and cell type deconvolution was performed using cluster-specific gene  
 1263 expression (mean UMI counts) determined by scRNA-seq. Significance was tested applying one-way  
 1264 ANOVA with Tukey's honestly significant differences. (B) Heatmap plotting expression (mean UMI  
 1265 counts) of 167 published MS risk genes (columns) (40) against CSF cell cluster (rows). Columns were  
 1266 hierarchically clustered using One minus Pearson correlation and selected gene names are indicated.  
 1267 Cluster names corresponding to Figures 1 and 2 are indicated above each plot. \*  $P < 0.05$ , \*\*  $P < 0.01$ ,  
 1268 \*\*\*  $P < 0.001$

1269

## Figure 4

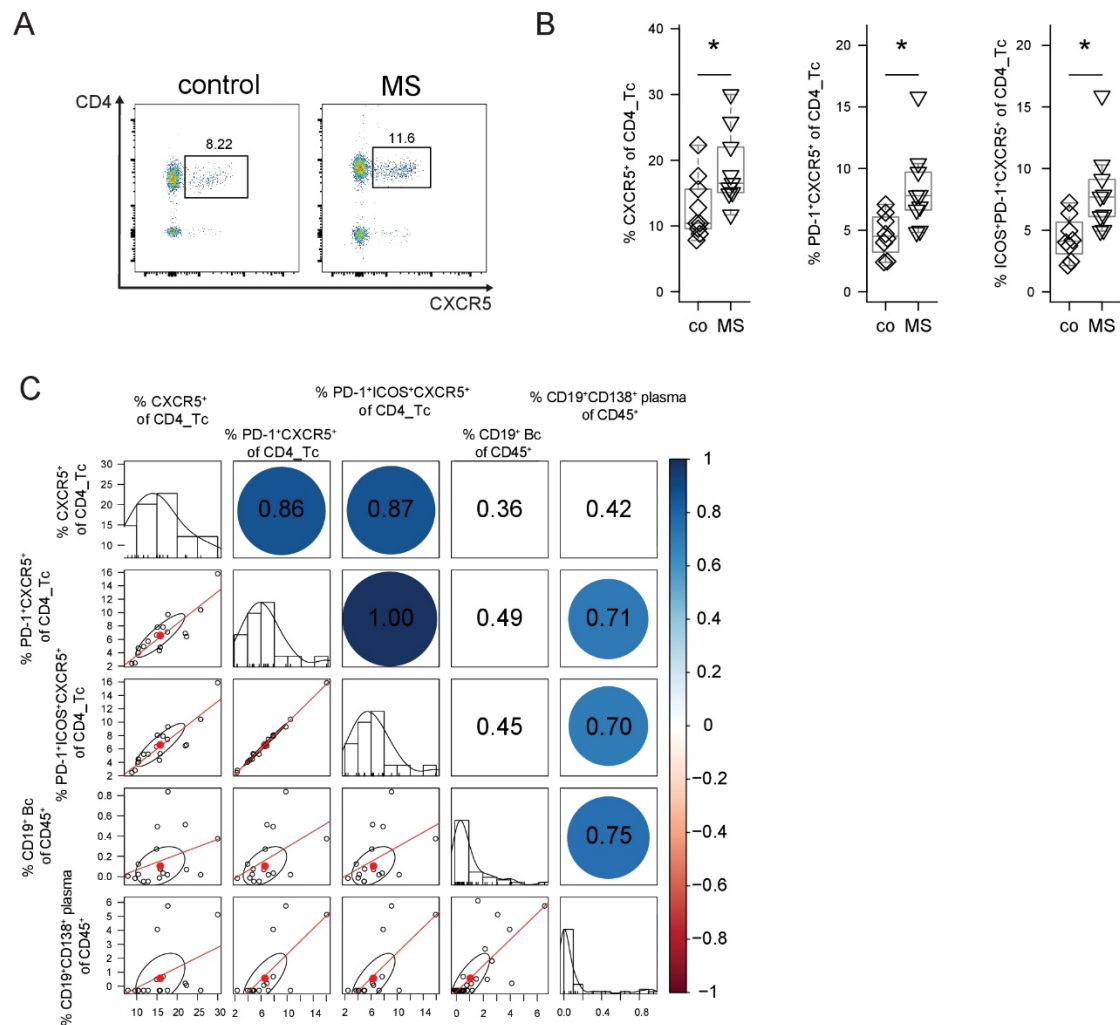

1270

1271 *Fig. 4. Increased T follicular helper (TFH) cells in the CSF of MS patients.*

1272 (A) Representative flow cytometry dot plot of CSF cells from a control and MS patient stained for CD4

1273 and CXCR5 after gating on live CD3<sup>+</sup> cells. (B) The proportion of CXCR5<sup>+</sup> (left), of PD-1<sup>+</sup>CXCR5<sup>+</sup>

1274 (middle), and of ICOS<sup>+</sup>PD-1<sup>+</sup>CXCR5<sup>+</sup> (right) cells among live CD3<sup>+</sup>CD4<sup>+</sup> T cells in CSF cells of

1275 control (co; n = 9) and MS (n = 9) patients was quantified by flow cytometry. (C) Correlation matrix of

1276 CXCR5<sup>+</sup> populations and CD19<sup>+</sup> and CD138<sup>+</sup>CD19<sup>+</sup> B lineage cells in the CSF. Blue circles indicate

1277 significance and the Pearson correlation coefficient is indicated. \*  $P < 0.05$

1278



## Figure 5

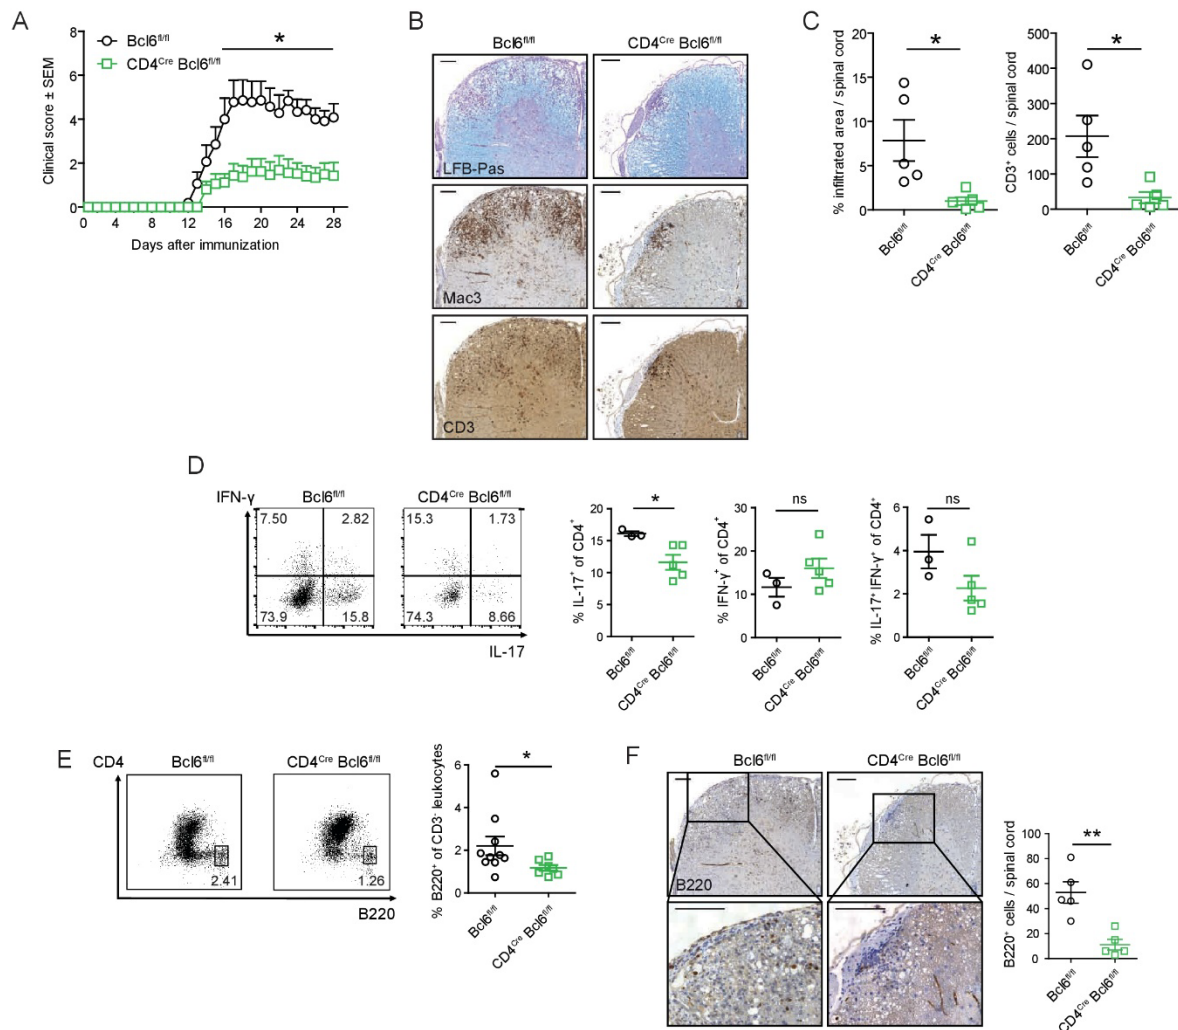

1279

1280 *Fig. 5. TFH cells promote neuroinflammation in vivo by expanding B cells.*

1281 (A) Active EAE was induced in control  $Bcl6^{fl/fl}$  ( $n = 6$ ) and TFH-deficient  $CD4^{Cre} Bcl6^{fl/fl}$  ( $n = 7$ ) mice

1282 using MOG<sub>35-55</sub> peptide (Methods). Mice were monitored daily for clinical EAE signs. One

1283 representative of four independent experiments is shown. (B) At day 28 after EAE induction, spinal

1284 cord paraffin cross-sections were stained for LFB-Pas, Mac3 and CD3. (C) The infiltrated area (left)

1285 and number of CD3<sup>+</sup> cells (right) per spinal cord was quantified manually in a blinded fashion. (D) CNS

1286 infiltrating lymphocytes were extracted at peak of EAE and stained for intracellular cytokines (IL-17

1287 and IFN- $\gamma$ ). The proportion of cytokine producing live CD4<sup>+</sup> T cells was quantified. (E) CNS infiltrating

1288 leukocytes were co-stained for B220 (left) and the proportion of CD3<sup>+</sup> B220<sup>+</sup> leukocytes was quantified

1289 (right). (F) Cross-sections of paraffin embedded spinal cords were stained for B220 (left) and the

1290 proportion of B220<sup>+</sup> cells was quantified (right). Scale bars represent 100  $\mu\text{m}$  in panels B and F. \*  $P <$

1291 0.05, \*\*  $P < 0.01$ , ns not significant.

1292

## Supplementary Materials

# Supplementary Figure 1

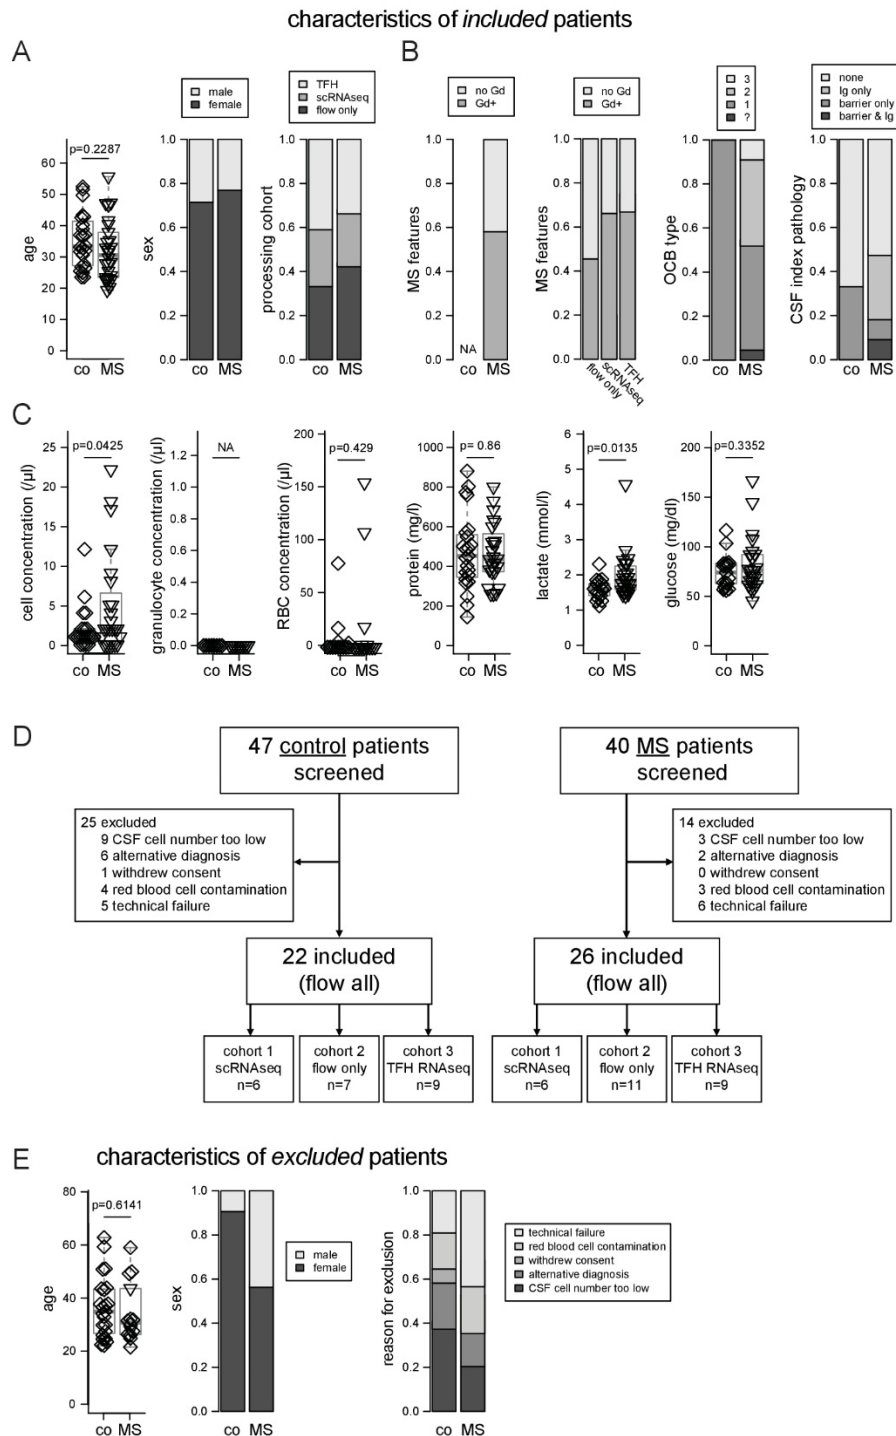

Fig. S1. Patient characteristics.

(A) Clinical characteristics (age, sex) of all control (co, n = 22) and multiple sclerosis (MS, n = 26) patients included into the study after screening are depicted incl. recruitment into the study cohorts. (B) MS patients were classified to either have (Gd+) or not have (no Gd) contrast enhancing lesions in brain or spinal cord detected by magnetic resonance imaging. Oligoclonal bands (OCB) in CSF were classified as being either undetectable (type 1), restricted to CSF (type 2), detected in serum and additionally in CSF (type 3), or not determined (?). CSF/serum indices for albumin and immunoglobulin G (IgG) were calculated. The CSF barrier function (CSF index pathology) was evaluated as being either unaffected (none), showing intrathecal IgG synthesis (Ig only), showing barrier dysfunction (barrier only), or showing both intrathecal IgG synthesis and barrier dysfunction (barrier & Ig). (C) Standard CSF parameters of all study patients including CSF concentrations of total cells, granulocytes, red blood cells (RBC), protein, lactate, and glucose. (D) The study recruitment scheme is depicted. 53% of control and 35% of MS samples were excluded after screening for the reasons indicated. Samples from all patients were divided into three cohorts and all samples were analysed by flow cytometry. Samples in were processed for scRNAseq in cohort 1 and for bulk RNA-seq of sorted T follicular helper cells (TFH) in cohort 3. Samples in cohort 2 were only analysed by flow cytometry. (E) Clinical characteristics (age, sex) of patients excluded after screening and reasons for exclusion are shown. NA not applicable.

## Supplementary Figure 2

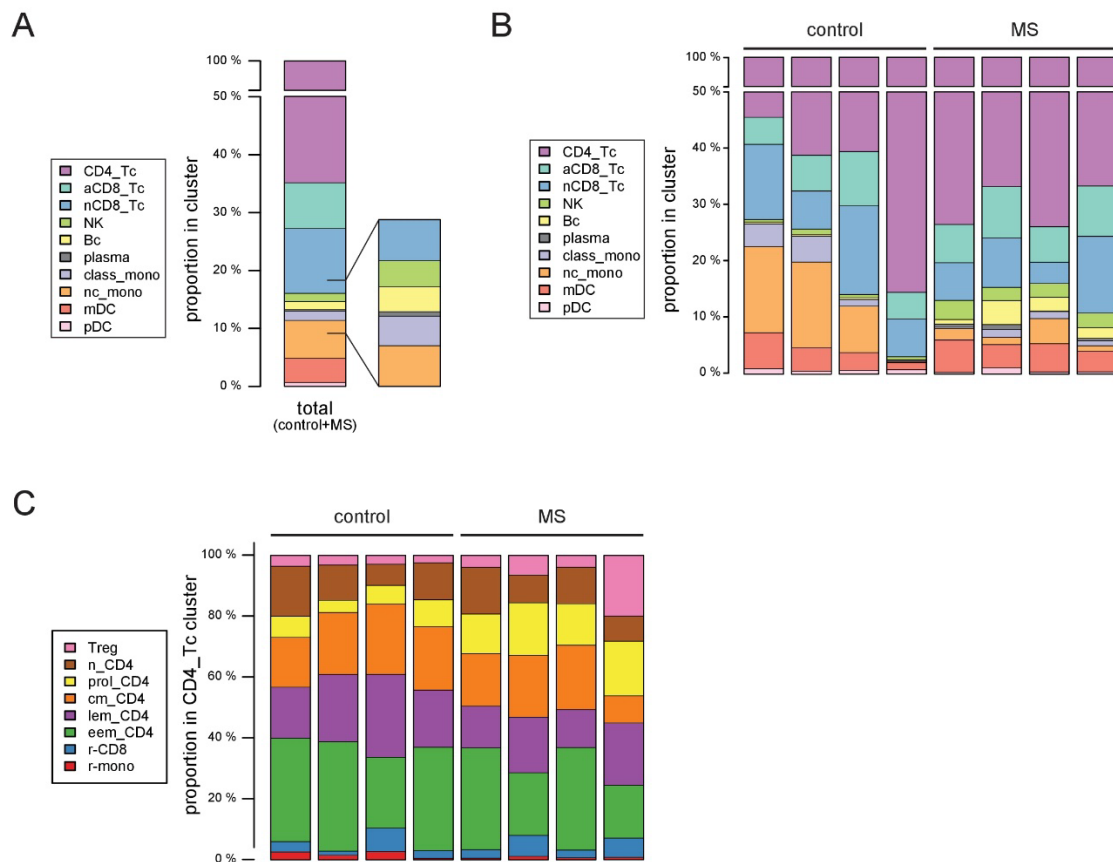

Fig. S2. Average and individual proportions of cell clusters of scRNA-seq samples.

(A) Barplot showing the average proportion of cells in each cluster in all samples (MS and control merged) (note split y-axis). Insets highlight abundance of rarer cell types. (B) Donor-specific proportions of cells in each cluster identified by scRNA-seq (note split y-axis) and (C) in each CD4<sup>+</sup> T-cell (*CD4\_Tc*) subcluster, for all control and MS patients individually. Cluster key: *CD4\_Tc* CD4<sup>+</sup> T cells, *aCD8\_Tc* / *nCD8\_Tc* activated / naïve CD8<sup>+</sup> T cells, *NK* natural killer cells, *Bc* B cells, *plasma* plasma cells, *class\_mono* / *nc\_mono* classical / non-classical monocytes, *mDC* / *pDC* myeloid / plasmacytoid dendritic cells; *Treg* regulatory T helper cells, *n\_CD4* naïve, *prol\_CD4* proliferating, *cm\_CD4* central memory, *lem\_CD4* late effector memory, *eem\_CD4* early effector memory, *r-CD8* remaining CD8<sup>+</sup> T cells, *r-mono* remaining monocytes.

## Supplementary Figure 3

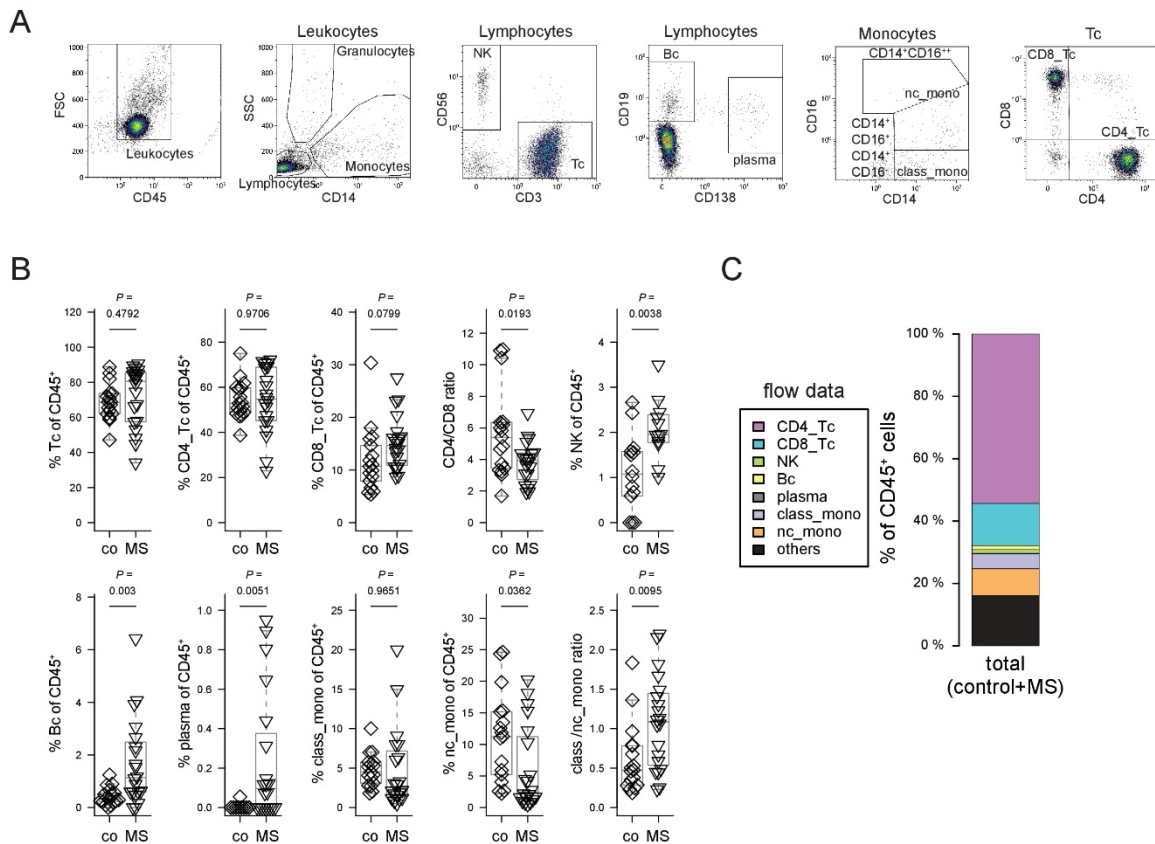

Fig. S3. Flow cytometry characterization of all CSF cell samples.

(A) Representative gating strategy for identifying and quantifying cell types by flow cytometry in the CSF. Population names are indicated next to the respective gates. The proportion of CD14<sup>+</sup>CD16<sup>++</sup> monocyte cells in the CSF was very low in accordance with a previous study (33). We therefore merged the CD14<sup>+</sup>CD16<sup>++</sup> with the CD14<sup>+</sup>CD16<sup>+</sup> cells and named this population as non-classical monocytes (*nc\_mono*) for consistency with scRNA-seq naming. (B) Quantification of the indicated cell types in CSF in control (co) and MS patients. All percentages are expressed as proportion of CD45<sup>+</sup> cells. Samples with less than 500 total CD45<sup>+</sup> events analysed by flow cytometry were excluded from NK quantification but not from other cell types. Two sided Student's t-test for unrelated samples was used to calculate significance. Exact *P*-values are indicated in the plot. (C) Average proportion of cells in each cluster measured by flow cytometry. Please note the split y-axis and higher magnification inset. *CD4<sup>+</sup>Tc* CD4<sup>+</sup> T cells, *CD8<sup>+</sup>Tc* CD8<sup>+</sup> T cells, *NK* natural killer cells, *Bc* B cells, *plasma* plasma cells, *class\_mono* / *nc\_mono* classical / non-classical monocytes.

## Supplementary Figure 4

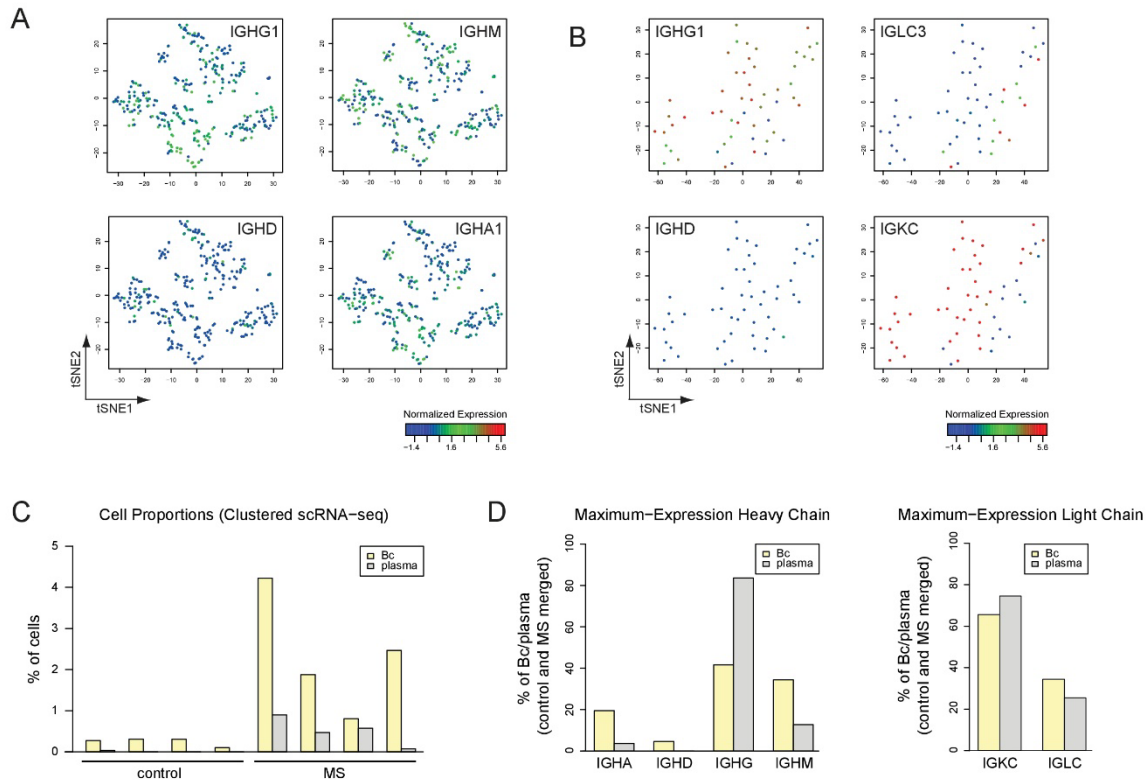

*Fig. S4. Late B lineage cells accumulate in the CSF in MS.*

(A) Feature plot highlighting the expression level of different heavy chain transcripts in the B cell (Bc) cluster identified in Figure 1B. (B) Feature plot as in panel A showing expression of selected heavy and light chain transcripts in the plasma cell cluster. (C) Proportions for cells in each donor within the B cell or plasma cell cluster. (D) Proportion of Bc and plasma cells expressing indicated heavy (left panel) and light (right panel) chain transcript classes at maximum level (per cell).



## Supplementary Figure 5

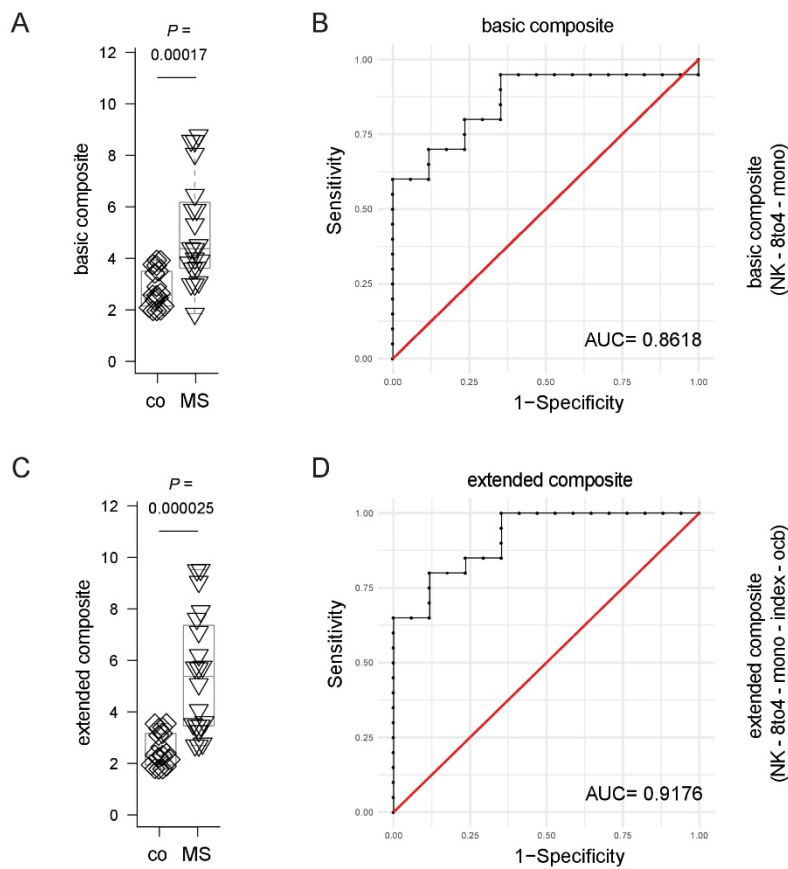

*Fig. S5. Evaluating a composite score for diagnosing MS by CSF analysis.*

(A) For each samples depicted in the merged flow cytometry data in Suppl. Fig. 3, we calculated a normalized ratio of the proportion of NK to CD4<sup>+</sup> T cells, of Bc to CD4<sup>+</sup> T cells, of CD8<sup>+</sup> to CD4<sup>+</sup> T cells, and of CD14<sup>+</sup>CD16<sup>-</sup> to CD14<sup>+</sup>CD16<sup>+</sup> monocytes. These four normalized ratios were added to a basic composite score that is depicted in control (co) vs. MS samples. (B) Receiver operator curve (ROC) analysis plotting sensitivity against 1-specificity and the area under the curve (AUC) of the composite. (C) Values of 1 were added to the basic composite depicted in panel A if an elevated immunoglobulin index or oligoclonal bands were detected in the sample. This extended composite score values are depicted by disease status. (D) Receiver operator curve (ROC) analysis of extended composite score.

## Supplementary Figure 6

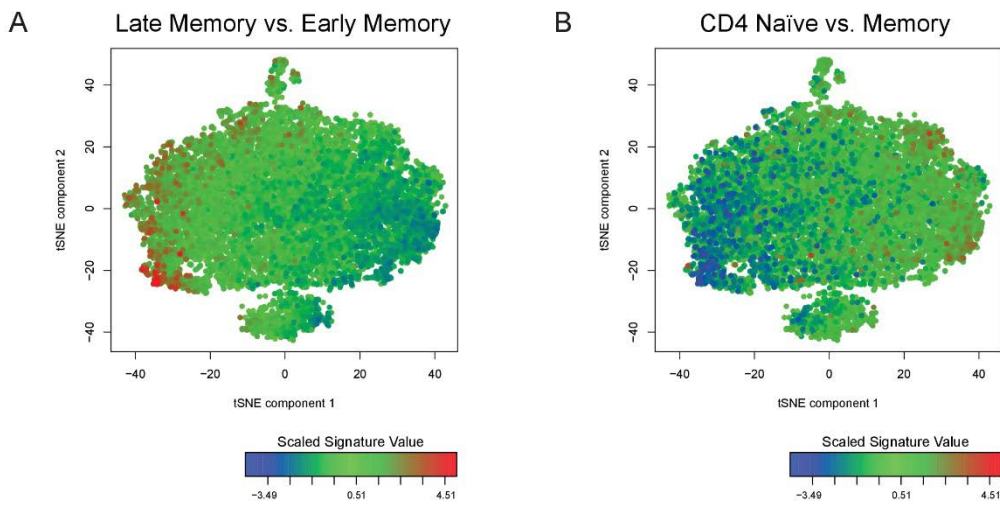

*Fig. S6. CD4<sup>+</sup> T cells are transcriptionally defined by a continuum.*

t-SNE feature plots for CD4<sup>+</sup> T cells subclusters representing VISION signatures with significant VISION consistency scores ( $P < 0.01$ ): (A) Late v. early memory signature score from a study on CD8<sup>+</sup> cells (36). (B) Naïve v. memory T Cell signature score (30).

## Supplementary Figure 7

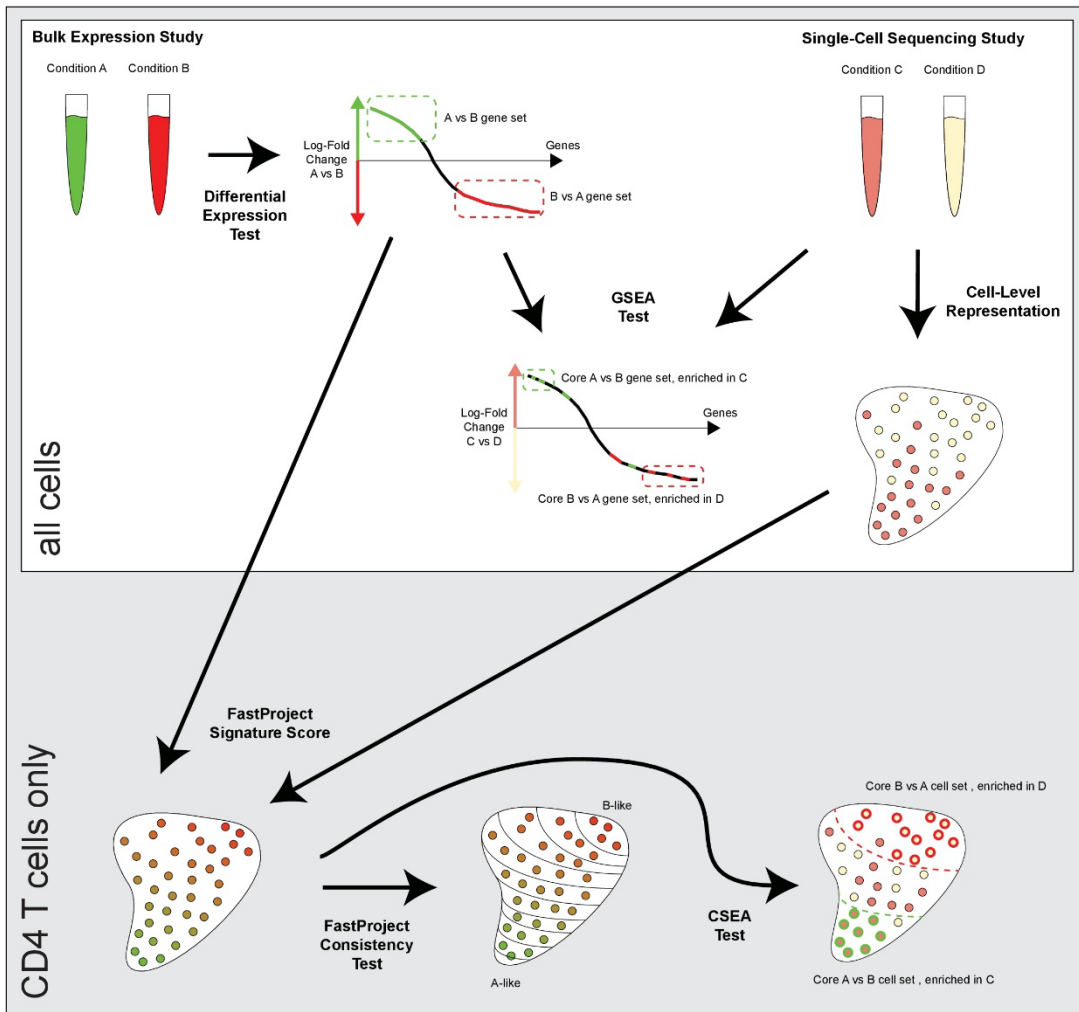

Fig. S7. Scheme of GSEA/VISION/CSEA Analysis.

Publicly available bulk microarray or RNA-seq data are used to identify gene signature sets characterizing immune cell populations. These gene sets are used for either (i) gene set enrichment analysis (GSEA) of our scRNA-seq differential expression results or (ii) single-cell VISION signature scores, input to both VISION Consistency testing and cell set enrichment analysis (CSEA) testing. Further details can be found in the Methods section.

## Supplementary Figure 8

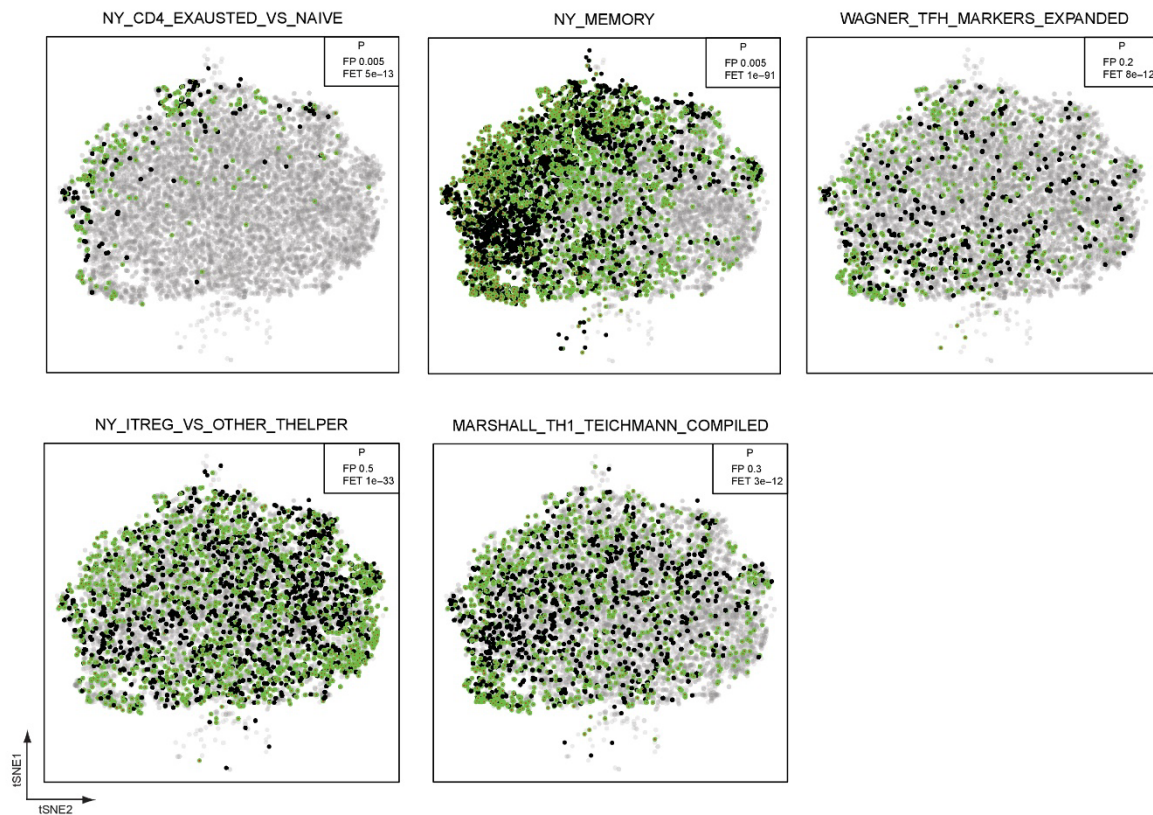

*Fig. S8. Cell set enrichment analysis helps identifying disease-specific transcriptional changes.*

tSNE plots annotated by representative examples of significant CSEA results for the CD4<sup>+</sup> subanalysis. In all cases, MS cells are enriched in the upper tail of the VISION signature distribution. Red points with green outline represent the core MS set driving the signature enrichment, black points are control members of the leading edge cell set. Cells depicted in grey are not members of the leading edge cell set. Exhausted vs. naïve (44), memory (45), T<sub>FH</sub> (48, 49), iTreg (47), Th1 (46).

## Supplementary Figure 9

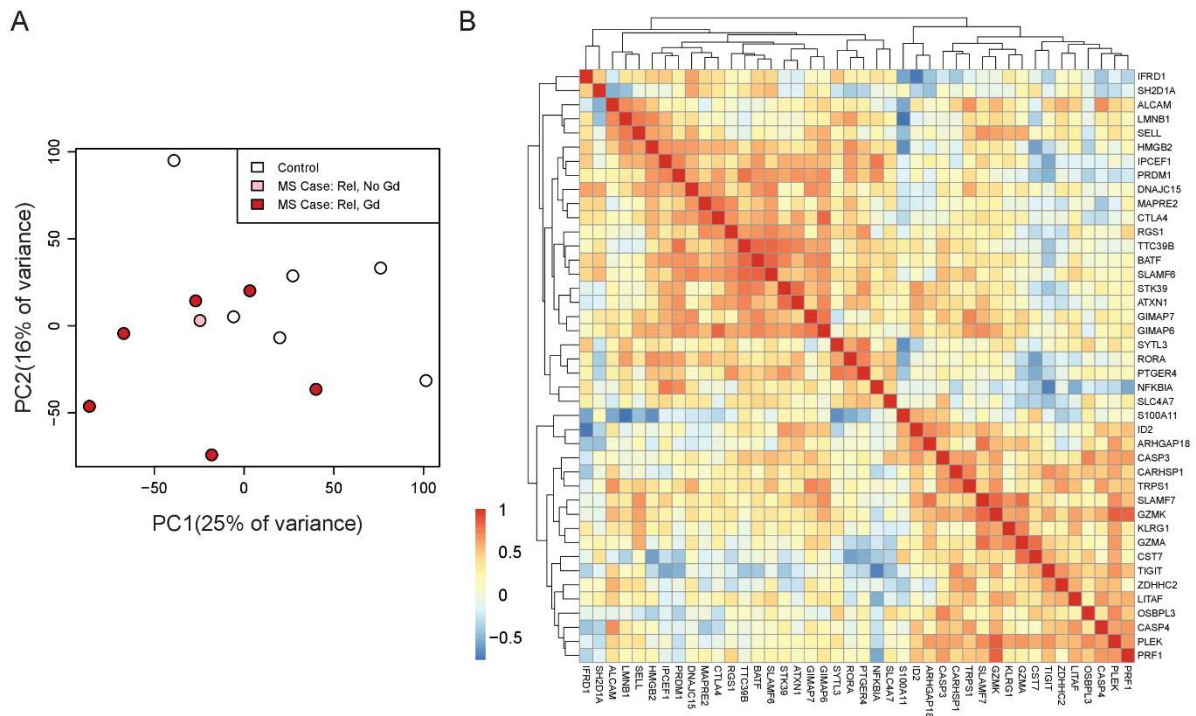

*Fig. S9. RNA bulk-seq of TFH cells.*

(A) Live CD3<sup>+</sup>CD4<sup>+</sup>CXCR5<sup>+</sup> cells quantified in Fig 5B were flow sorted from the CSF of control (237±107 SD cells) and MS patients (852±691 SD cells), followed by bulk RNA-seq. Scatter plot depicts a principal component analysis (PCA) of normalized TFH gene log-count data, annotated by MS phenotype. (B) Genes differentially expressed in MS vs. controls were sorted by significance score and input into GSEA to identify biologically meaningful enrichments. The most frequent members of core gene sets driving functional enrichments in MS are plotted in a gene-gene Pearson correlation matrix (Methods).

## Supplementary Fig 10

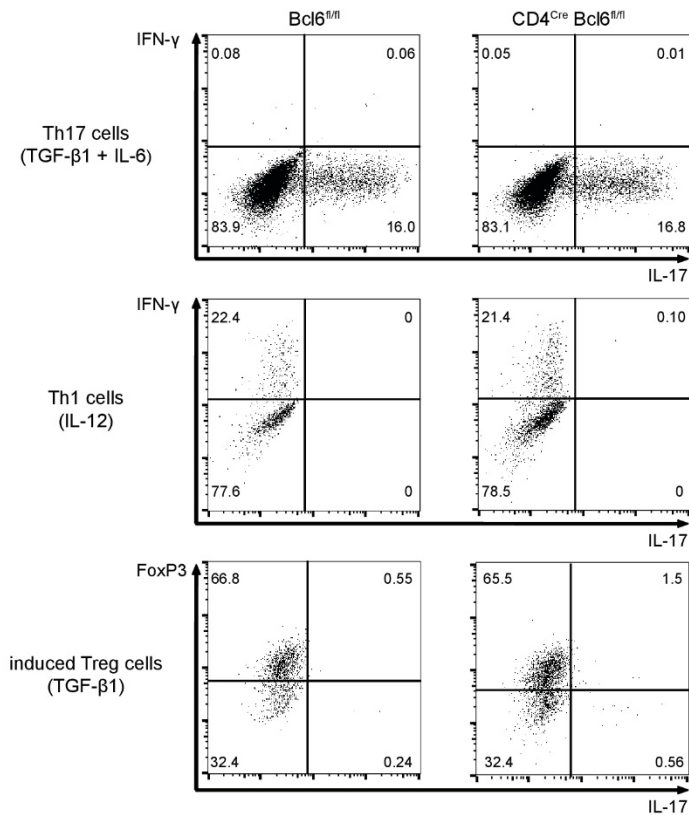

*Fig. S10. Bcl6 deficiency does not affect in vitro T helper cell differentiation.*

(A) Naïve  $CD4^{+}CD62L^{high}CD44^{low}CD25^{-}$  T cells were sorted from  $Bcl6^{fl/fl}$  mice and  $CD4^{Cre} Bcl6^{fl/fl}$  mice, differentiated in the presence of TGF- $\beta$ 1 and IL-6, or IL-12 alone, or TGF- $\beta$ 1 alone and analysed by intracellular cytokine staining after 4 days in culture.



## Supplementary Figure 11

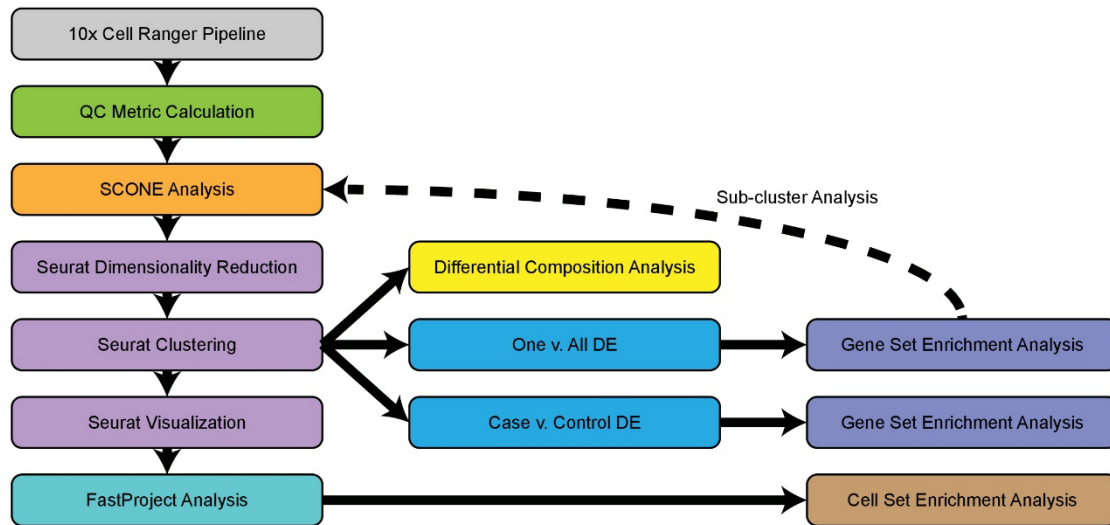

*Supplementary Figure 11: Workflow of scRNA-seq analysis.*

Scheme depicting the scRNA-seq analysis workflow utilized in this study. Analysis begins with 10X (10X Genomics) Cell Ranger processing and cell-level QC (quality control) metric evaluation, followed by SCONE data filtering and normalization, Seurat dimensionality reduction, clustering and visualization. Results from these analyses are input into VISION for signature calculation and consistency testing. These signatures may be used for CSEA testing. Differential abundance analysis is performed based on the Seurat clustering, and various forms of differential expression testing, including one v. all, “marker” analysis and cluster-specific case v. control analysis are performed using a meta-analysis approach that supports IDR modelling with scRAD tools. GSEA testing is used to ascribe biologic meaning to differential expression results, motivating further subclustering analysis, in which a cluster is analysed using an identical analytical procedure.



## Supplementary Table Legends

*Table S1. Summarized information about patients in the present study.*

Clinical characteristics (average age, sex) of all control (IIH, n=22) and multiple sclerosis (MS, n=26) patients included in the study after screening are depicted. Numbers of excluded patients for each group are also shown. All included patients were divided over three cohorts, cohort 1: CSF samples used for single cell RNA-seq. (6 control vs. 6 MS), cohort 2: CSF samples analysed by flow cytometry only (7 control vs. 11 MS) and cohort 3: CSF samples flow sorted for RNA-seq of CD3<sup>+</sup>CD4<sup>+</sup>CXCR5<sup>+</sup> TFH cells (9 control vs. 9 MS).

*Table S2. Standard CSF parameters and MS disease features of patients in the present study.*

CSF parameters and MS disease features of all control (IIH, n=22) and multiple sclerosis (MS, n=26) patients included in the study are depicted. All included patients were divided over three cohorts, cohort 1: CSF samples used for single cell RNA-seq. (6 control vs. 6 MS), cohort 2: CSF samples analysed by flow cytometry only (7 control vs. 11 MS) and cohort 3: CSF samples flow sorted for RNA-seq of CD3<sup>+</sup>CD4<sup>+</sup>CXCR5<sup>+</sup> TFH cells (9 control vs. 9 MS). All MS patients were classified if they had a relapse at CSF collection, if they had (Gd+) or not had (no Gd) contrast enhancing lesions in brain or spinal cord or if they had other MS typical characteristics observed by magnetic resonance imaging (MRI). Oligoclonal bands (OCB) in CSF were classified as being either undetectable (type 1), or restricted to CSF (type 2), or detected in serum and additionally in CSF (type 3), or not determined (?). The CSF barrier function was evaluated as being either unaffected (none), or showing intrathecal IgG synthesis (Igonly), or showing barrier dysfunction (barrier only), or showing both intrathecal IgG synthesis and barrier dysfunction (barrier & Ig) or being unclassified (unknown). Standard CSF parameters of all study patients including CSF concentrations of protein, lactate, glucose, total cells, granulocytes and red blood cells (RBC) are also depicted.

*Table S3. Technical information of scRNA-seq results.*

Technical information on scRNA-seq results of all patients (Control, n=4 and MS, n=4) included in the study are depicted. Depicted is the number of samples used for scRNA-seq (number of samples for 10x), the total number of expected cells based on counting cells included in each sample multiplied by the approximate capture rate of the 10x system (total number of expected cells), the total number of measured cells after sequencing and genome alignment (total number of measured cells), average number of measured cells per sample (average number of measured cells), average number of detected reads per cell (reads per cell) and average number of detected genes per cell (genes per cell) used for downstream analysis. The total and average number of cells measured within the CD4<sup>+</sup> T cell (CD4\_Tc) cluster is also depicted.

*Table S4. Merged results of the scRNA-seq analysis.*

Genes most differentially expressed in clusters identified in the first clustering including all cells (All) and in the secondary CD4<sup>+</sup> T cell clustering (CD4) are listed. Depicted are the Ensembl IDs of the Genes tested (Ensembl ID), the common Gene names (Gene Symbol), the cluster analysed (Cluster), the median log<sub>2</sub> fold change (Median Log<sub>2</sub> Fold Change), the irreproducible discovery rate (IDR), the statistical significance (Meta-analysis *P*-value) and the false discovery rate (Meta-analysis FDR). Candidate genes were defined as reaching a threshold of either log<sub>2</sub> fold change and IDR and FDR, or IDR and FDR, or Median Log<sub>2</sub> Fold Change and FDR. Additionally, candidate genes from different DE analysis comparing one cluster to all others (One vs. All (Marker)) and comparing same clusters between Multiple sclerosis patients (MS) and Control patients (IIH) (MS vs. IIH (Exposure)) are depicted.

*Table S5. Gene set enrichment analysis (GSEA) results for genes differentially expressed by clusters.*

Gene set enrichment analysis (GSEA) was performed on all marker genes for every cluster after the first clustering using all cells. Depicted are enriched Gene Sets (Signature), reference links to the GSEA data base (Origin), GSEA Enrichment Scores (EScore), statistical significance (PValue), simulated *P*-values using bonferroni correction (sim\_p\_bonferroni), Cluster analysed (Cluster), differential analysis type (DEType), direction of Gene set enrichment (Sign) and signature containing collections

(signatures\_NY\_private, c1.all.v6.1.symbols, c2.all.v6.1.symbols, c2.cgp.v6.1.symbols, c2.cp.biocarta.v6.1.symbols, c2.cp.kegg.v6.1.symbols, c2.cp.reactome.v6.1.symbols, c2.cp.v6.1.symbols, c3.all.v6.1.symbols, c3.mir.v6.1.symbols, c3.tft.v6.1.symbols, c4.all.v6.1.symbols, c4.cgn.v6.1.symbols, c4.cm.v6.1.symbols, c5.all.v6.1.symbols, c5.bp.v6.1.symbols, c5.cc.v6.1.symbols, c5.mf.v6.1.symbols, c6.all.v6.1.symbols, c7.all.v6.1.symbols, h.all.v6.1.symbols, msigdb.v6.1.symbols).

*Table S6. Gene set enrichment analysis (GSEA) results for genes differentially expressed in MS vs. control samples.*

Gene set enrichment analysis (GSEA) was performed on all differentially expressed (MS vs. control) marker genes for every cluster after the first clustering (All). Depicted are enriched Gene Sets (Signature), reference links to the GSEA data base (Origin), GSEA Enrichment Scores (EScore), statistical significance (*P*-value), simulated *P*-values using bonferroni correction (sim\_p\_bonferroni), Cluster analysed (Cluster), differential analysis type (DEType), direction of Gene set enrichment (Sign) and signature containing collections (signatures\_NY\_private, c1.all.v6.1.symbols, c2.all.v6.1.symbols, c2.cgp.v6.1.symbols, c2.cp.biocarta.v6.1.symbols, c2.cp.kegg.v6.1.symbols, c2.cp.reactome.v6.1.symbols, c2.cp.v6.1.symbols, c3.all.v6.1.symbols, c3.mir.v6.1.symbols, c3.tft.v6.1.symbols, c4.all.v6.1.symbols, c4.cgn.v6.1.symbols, c4.cm.v6.1.symbols, c5.all.v6.1.symbols, c5.bp.v6.1.symbols, c5.cc.v6.1.symbols, c5.mf.v6.1.symbols, c6.all.v6.1.symbols, c7.all.v6.1.symbols, h.all.v6.1.symbols, msigdb.v6.1.symbols).

*Table S7. VISION and Cell set enrichment analysis (CSEA) results for T cell signatures.*

Cell set enrichment analysis (CSEA) was performed on all CD4<sup>+</sup> T cells after removing residual clusters. Columns in this sheet include i) signature set (Signature), ii) VISION Z-score (VISIONZ), iii) Benjamini-Hochberg *Q*-values from permutation-based VISION *P*-values (VISIONQ), iv) positive signature MS enrichment score (csea\_sign1\_MS\_enriched\_e\_score), v) simulated *P*-values for the positive MS enrichment score, adjusted using the Bonferroni correction (csea\_sign1\_MS\_enriched\_sim\_p\_bonferroni), vi) number of cells in the positive leading edge for

enrichment in MS (csea\_sign1\_MS\_enriched\_leading\_edge\_size), vii-ix) analogous columns for negative signature MS enrichment (csea\_sign-1\_MS), x-xii) analogous columns for positive signature control (IIH) enrichment (csea\_sign1\_IIH), and xiii-xv) analogous columns for negative signature control (IIH) enrichment (csea\_sign-1\_IIH).

*Table S8. Flow sorting related information.*

Statistics of follicular T helper (TFH) cells analysed and sorted out of CSF using fluorescence activated cell sorting (FACS) for all control (n=9) and multiple sclerosis (MS, n=9) patients. Depicted are the number of processed samples (# samples processed), the number of CSF TFHs analysed (CSF TFH (#)) and the average number of TFHs per sample (average  $\pm$  SD).

*Table S9. Differentially expressed genes and gene set enrichment analysis (GSEA) in CSF-derived TFH cells in MS vs. control patients.*

Per-gene differential expression (DE) analysis was performed on TFH cells sorted out of the CSF from MS and control patients. The limma::topTable results for disease effect estimation are tabulated in the “DE” sheet. Columns in this sheet include i) the symbol for the gene tested (Gene Symbol), ii)  $\log_e$  fold-changes (MS vs. control) in normalized expression (logFC), iii) average normalized  $\log_e$ -expression (AveExpr), iv) moderated t-values (t), v) statistical significance (*P*-Value), vi) Benjamini-Hochberg *Q*-value and vii) log-odds that the gene is differentially expressed (B). The B-value is the log-odds that the gene is differentially expressed.

Gene set enrichment analysis (GSEA) was performed on significance scores derived from comparisons of TFH cells sorted out of the CSF from MS and Control patients; results are shown in the “GSEA” sheet. Columns in this sheet include i) the gene set origin, e.g. an experimental comparison from which the gene set is derived (Signature), signature subset, indicating whether the subset is up-regulated or down-regulated in the external comparison (Signature subset), gene set enrichment score for genes with high significance scores (EScore), simulated *P*-values, adjusted using the Bonferroni correction for multiple testing (sim\_p\_bonferroni), names of genes driving the gene set enrichment (Core Genes), number of genes driving the gene set enrichment (Number of Core Genes).

*Table S10. Deconvolution results.*

scRNA-sequencing data were used to deconvolute the cell composition of already published bulk sequencing data. Depicted are input samples deconvolution was performed on (Input Sample) and the percentile composition of the different populations identified by scRNA-seq. Cluster key: *aCD8\_Tc* / *nCD8\_Tc* activated / naïve CD8 T cells, *Bc* B cells, *class\_mono* classical monocytes, *mDC* myeloid dendritic cells,, *nc\_mono* non-classical monocytes, *NK* Natural killer cells,, *pDC* plasmacytoid dendritic cells, *plasma* plasma cells, *Treg* regulatory T cells ; statistical significance (*P*-value), statistical correlation (Pearson Correlation) and Root Mean Square Error (RMSE).
